# Supplementary material for: Psychological distress mediates the association between daytime sleepiness and consumption of sweetened products: cross-sectional findings in a Catholic Middle-Eastern Canadian community
Source: PubMed Central journal article supplement — BMJ Open. 2013 Feb 12;3(2):e002298. doi: 10.1136/bmjopen-2012-002298 (PMC3586132; doi:10.1136/bmjopen-2012-002298), 2013-02-12
Supplement: bmjopen-2012-002298.draft_revisions.pdf [file bmjopen-2012-002298.draft_revisions.pdf]

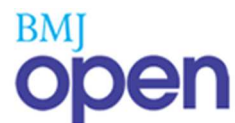

**Psychological distress mediates the association between daytime sleepiness and consumption of sweetened products: Cross-sectional findings in a Catholic Middle Eastern Canadian community**

|                                 |                                                                                                                                                                                         |
|---------------------------------|-----------------------------------------------------------------------------------------------------------------------------------------------------------------------------------------|
| Journal:                        | <i>BMJ Open</i>                                                                                                                                                                         |
| Manuscript ID:                  | bmjopen-2012-002298                                                                                                                                                                     |
| Article Type:                   | Research                                                                                                                                                                                |
| Date Submitted by the Author:   | 06-Nov-2012                                                                                                                                                                             |
| Complete List of Authors:       | Moubarac, Jean-Claude; Université de Montréal, Cargo, Margaret; University of South Australia, Receveur, Olivier ; Université de Montréal, Daniel, Mark; University of South Australia, |
| <b>Primary Subject Heading</b>: | Public health                                                                                                                                                                           |
| Secondary Subject Heading:      | Epidemiology                                                                                                                                                                            |
| Keywords:                       | Migrant health, Middle Eastern Canadian, sweetened foods, daytime sleepiness, psychological distress, mediation analysis                                                                |
|                                 |                                                                                                                                                                                         |

SCHOLARONE™  
Manuscripts

1  
2  
3  
4 1 Psychological distress mediates the association between daytime  
5 2 sleepiness and consumption of sweetened products: Cross-  
6 3 sectional findings in a Catholic Middle Eastern Canadian  
7 4 community.  
8  
9

10 5  
11 6 **Jean-Claude Moubarac<sup>a</sup>, PhD, Margaret Cargo<sup>b</sup>, PhD, Olivier**  
12 7 **Receveur<sup>c</sup>, PhD and Mark Daniel<sup>b</sup>, PhD**  
13 8

14 9  
15  
16 9 <sup>a</sup> École de Santé Publique, Université de Montréal, 1420, boul.Mont-Royal, Montréal  
17 10 (Québec) H2V 4P3, Canada. <sup>b</sup> School of Health Sciences, University of South Australia,  
18 11 GPO Box 2471, Adelaide SA 5001, Australia, <sup>c</sup> Département de Nutrition, Université de  
19 12 Montréal, 2405, Ch.de la Côte-Sainte-Catherine, Montréal (Québec) H3T 1A8, Canada.  
20 13  
21 14

22 15  
23 16 **Institution where the work was performed:** École de Santé Publique, Université de  
24 17 Montréal, 1420, boul.Mont-Royal, Montréal (Québec) H2V 4P3, Canada  
25 18

26 19 **Corresponding author (Jean-Claude Moubarac): [jcmoubarac@gmail.com](mailto:jcmoubarac@gmail.com)**  
27 20 Núcleo de Pesquisas Epidemiológicas em Nutrição e Saúde, Universidade de São Paulo,  
28 21 Av. Dr. Arnaldo 715, 01246-904, São Paulo, SP, Brasil. Tel: 55-11-2592-2572  
29 22  
30 23

31 24  
32 25  
33 26  
34 27  
35 28  
36 29  
37 30  
38 31  
39 32  
40 33  
41 34  
42 35  
43 36  
44 37  
45 38  
46 39  
47 40  
48 41  
49 42  
50 43  
51 44  
52 45  
53 46  
54 47  
55 48  
56 49  
57 50  
58 51  
59 52  
60 53

Word count : 4077

26 No funding was received for this study. The authors report no conflict of interests.  
27  
28  
29  
30  
31  
32  
33  
34  
35  
36  
37  
38

1  
2  
3 39  
4 40  
5 41  
6 42  
7 43  
8 44  
9 45  
10 46  
11 47  
12 48  
13 49  
14 50  
15 51  
16 52  
17 53  
18 54  
19 55  
20 56  
21 57  
22 58  
23 59  
24 60  
25 61  
26 62  
27 63  
28 64  
29 65  
30 66  
31 67  
32 68  
33 69  
34 70  
35 71  
36 72  
37 73  
38 74  
39 75  
40 76  
41 77  
42 78  
43 79  
44 80  
45 81  
46 82  
47 83  
48 84  
49 85  
50  
51  
52  
53  
54  
55  
56  
57  
58  
59  
60

## Abstract

Objective: To examine the associations between consumption of sweetened products, daytime sleepiness (DS) and psychological distress (PD) in a Catholic Middle Eastern Canadian community, and to test the hypothesis that the association between DS and consumption of sweetened products is mediated by PD.

Design: Cross-sectional study

Setting: A Catholic Middle-Eastern Canadian community

Participants: 186 men and women aged between 18-60 years old

Primary and secondary outcome measures: Sweetened product consumption was measured using a food frequency questionnaire (total sugars/day). DS and PD were measured using standardized questionnaire. The generalised linear model was used to estimate associations between sweetened product consumption, age, sex, self-reported body mass index, DS and PD. Baron and Kenny's four-step approach in addition to the Sobel test were used to establish mediation.

Results: Average DS score was 8.2 (SD= 4.5) with 19.5% having excessive scores (>12). Mean PD score was 20.8 (SD= 6.2) with 11.8% having high distress scores. Average consumption of sweetened products was 15.5 g/day (SD=13.9). Baron and Kenny's four-step approach to establish mediation were confirmed. First, DS was associated with consumption of sweetened products ( $p<0.03$ ). Second, DS and PD were correlated ( $r=0.197$ ;  $p<0.04$ ). Third, PD was associated with consumption of sweetened products ( $p<0.01$ ) when both PD and DS were entered as predictors in a multivariate regression. Fourth, the coefficient relating sweetened product consumption to DS was larger ( $\beta=0.05$ ) than the coefficient relating DS to sweetened products consumption ( $\beta=0.03$ ) with both DS and PD entered in the multivariate model. Finally, the Sobel test was significant (2.14;  $p<0.03$ ).

Conclusion: Daytime sleepiness is associated to the consumption of sweetened products in the Catholic Middle Eastern community of Montreal, Canada. This association is partially mediated by psychological distress.

Key words: Migrant health, Middle Eastern Canadian, sweetened foods, daytime sleepiness, psychological distress, mediation analysis.

1  
2  
3  
4  
5  
6  
7  
8  
9  
10  
11  
12  
13  
14  
15  
16  
17  
18  
19  
20  
21  
22  
23  
24  
25  
26  
27  
28  
29  
30  
31  
32  
33  
34  
35  
36  
37  
38  
39  
40  
41  
42  
43  
44  
45  
46  
47  
48  
49  
50  
51  
52  
53  
54  
55  
56  
57  
58  
59  
60

#### Article focus:

- This study examines the association between consumption of sweetened products, daytime sleepiness and psychological distress in a Catholic Middle Eastern Canadian community.
- We use Baron and Kenny's (1986) four-step approach and the Sobel test to verify alternative mediating models between these three variables.

#### Key messages

- Daytime sleepiness is associated to the consumption of sweetened products and this association is partially mediated by psychological distress.
- This study highlights that sleep, mood and diet are interconnected, and that efforts to improve diet quality must consider the psychosocial well-being of individuals

#### Strength and limitations

- The strengths include the testing of alternative mediating models and the use of well-established procedures to assess mediation
- Due to the cross-sectional nature of the study it is impossible to know the causal order of the observed associations, and the existence of bi-directional effects. The results of this study are also limited to the studied community and future work is necessary to expand them in other migrant populations.

## 128 Introduction

129 The prevalence of overweight/obesity and chronic diseases, as well as their associated  
130 risk factors, vary dramatically by ethnic groups in Canada[1]. Canadians of Arab (or  
131 Middle East) origin<sup>1</sup> represent more than 1.2% of the total Canadian population[2] and  
132 comprise one of the largest non-European ethnic groups in Canada. After adjusting for  
133 socioeconomic factors, Arab Canadians are more likely to be obese than White, Chinese,  
134 Japanese and South Asian groups [3]. Furthermore, the prevalence of obesity is much  
135 higher amongst long-term Arab migrants ( $\geq 11$  or more years) than the more recent  
136 migrants ( $\leq 10$  years) to Canada[1]. The high prevalence of obesity amongst Arabs and  
137 the finding that the prevalence increases with time may result from the adoption of  
138 dietary and behavioural risk factors uncommon to the environment of their home  
139 countries prior to migration and acquired during the acculturation process in Canada[1, 4,  
140 5].

141  
142 A modifiable dietary risk factor contributing to the development of obesity is the  
143 consumption of ultra-processed products high in dietary sugars, or sweet food and drink  
144 products [6]. Such products include soft drinks, sweetened juices and beverages, candies  
145 and chocolates, sugary baked goods, ice creams, and other desserts [7]. These products  
146 share many nutritional characteristics that make them unhealthy; they are energy dense  
147 (for solids), they have an excessive content in free sugars, and some are also high in fats  
148 and saturated fats[8]. Furthermore, they are sold in large portion sizes and are commonly  
149 consumed as snacks both of which may contribute to energy imbalance[9]. Even more  
150 problematic is the fact that sweet food and drink have specific psychological properties  
151 that trigger consumption; they are hyper-palatable [10-12] and their sweet taste works to  
152 alleviate dysphoric mood or stress through dopaminergic and opioidergic neuro-  
153 transmission in the brain[13-15].

154

---

<sup>1</sup> Denotes people from the Middle East or North African region who reported Arab (or an origin that originates in the region commonly referred to as the Arab world), either alone or in combination with other ethnic origins in response to the question on ethnic origin in the 2001 Census or 2002 Ethnic Diversity Survey. In this paper, the terms Arab and Middle Eastern are used interchangeably.

1  
2  
3 155 Middle Easterners are known for the daily consumption of sweet tea. However, other  
4  
5 156 sweet products have a secondary role in traditional Middle Eastern cuisine in that they are  
6  
7 157 mostly home-prepared pastries and deserts most frequently consumed during festivities  
8  
9 158 and on special occasions [16, 17]. Young Egyptian women and men more often reported  
10  
11 159 cravings for savories (meat and vegetables based dishes) than cravings for sweets,  
12  
13 160 contrary to studies conducted in Canada and United States [18]. However, the quantity,  
14  
15 161 use and significance of sweet food and drink have significantly changed in the last  
16  
17 162 decades in Lebanon, Egypt and Syria, with a parallel increase in obesity and chronic  
18  
19 163 diseases [16, 19, 20]. Similarly, Arabs are exposed to a new food environment when they  
20  
21 164 migrate to Canada where sweetened products are abundant, cheap, convenient,  
22  
23 165 accessible, and part of the mainstream food culture. Such an experience creates a variety  
24  
25 166 of social and economic challenges for maintaining ethnic cuisine as a marker of  
26  
27 167 community affiliation and may be a potential source of stress and anxiety [21].  
28  
29 168

30 169 Understanding why individuals consume sweetened products is a complex issue,  
31  
32 170 especially given the psychological properties of these foods and their effects in the brain.  
33  
34 171 A review of the literature suggests that two sets of inter-related psychosocial factors are  
35  
36 172 associated with the consumption of sweetened products; sleep-related problems and  
37  
38 173 mood/stress-related problems. However, the nature of the relationships between these  
39  
40 174 factors is not well understood [22].  
41  
42 175

43 176 Excessive daytime sleepiness is characterized by persistent sleepiness and lack of energy,  
44  
45 177 most often caused by sleep deprivation, obstructive sleep apnea and/or use of medication  
46  
47 178 [23]. It is present in all individuals, regardless of age, and recognized as the first  
48  
49 179 symptom that defines narcolepsy [24]. Both excessive daytime sleepiness [25, 26] and  
50  
51 180 narcolepsy [24] have been associated with the development and/or exacerbation of  
52  
53 181 obesity. One potential mechanism explaining this association is through effects on  
54  
55 182 appetite and intake of food[22]. Indeed, excessive daytime sleepiness has been associated  
56  
57 183 with the consumption of food high in fats, as well as refined carbohydrates[22]. A recent  
58  
59 184 study found that excessive daytime sleepiness was associated with the consumption of  
60  
185 refined carbohydrate-rich snacks amongst Japanese children[27]. A very-low

1  
2  
3 186 carbohydrate, high-protein diet has shown improvement in daytime alertness in adults  
4  
5 187 patients with narcolepsy[28]. In another study, subjects fed a carbohydrate liquid diet  
6  
7 188 scored higher for subjective fatigue than those fed with a high-fat or a high-protein diet  
8  
9 189 [29]. Hormonal, metabolic, and inflammatory mechanisms could explain why a diet high  
10  
11 190 in fats and/or sugars could induce somnogenic effects in the body [22].  
12  
13 191

14 192 There is evidence that the association between daytime sleepiness and sweet products  
15  
16 193 may be explained by the mediating effects of mood/stress problems, such as  
17  
18 194 psychological distress. This mediating effect is supported in the literature for several of  
19  
20 195 Baron and Kenny's criteria to establish mediation[30]. First, there is supporting evidence  
21  
22 196 that daytime sleepiness is associated with consumption of processed food high in dietary  
23  
24 197 sugars[28{Gaina, 2007 #257}]. Second, daytime sleepiness is correlated with depression  
25  
26 198 and psychological distress in both Western and Arab populations [31-34]. Third, a  
27  
28 199 preference for chocolate and other sweet products is well documented in depressed and  
29  
30 200 psychological distressed individuals[35, 36]. This preference could be explained by the  
31  
32 201 effects of sweets on relieving mood or stress [13-15]. If sleepy individuals also tend to  
33  
34 202 feel distressed, and psychological distress induces the consumption of sweet products,  
35  
36 203 then the relationship between daytime sleepiness and the consumption of these products  
37  
38 204 could be, at least, partially mediated by psychological distress.  
39  
40 205

41 206 Daytime sleepiness and psychological distress, and their relationship to the consumption  
42  
43 207 of sweet products have never been studied in Arab Canadians. Addressing this gap could  
44  
45 208 shed light on the prevention/management of obesity in the Canadian Arab community.  
46  
47 209 The burden of obesity in this community has important human and economic  
48  
49 210 consequences for the Canadian public health system because Arabs are one of the fastest  
50  
51 211 growing migrant groups in Canada, constituting more than 4% of the urban population of  
52  
53 212 Montreal and Ottawa[2]. Understanding the relationship between daytime sleepiness,  
54  
55 213 psychological distress and diet could provide useful information to improve daytime  
56  
57 214 alertness, psychological well-being and diet quality, all of which are known risk factors  
58  
59 215 to obesity and chronic diseases. From this perspective, this paper has two objectives: 1) to  
60  
216 report on the prevalence of excessive daytime sleepiness and psychological distress in an

1  
2  
3 217 Arab community living in Montreal[2], and 2) to test whether the relationship between  
4  
5 218 daytime sleepiness and consumption of sweet products is mediated by psychological  
6  
7 219 distress using Baron and Kenny's [30] criteria and the Sobel test.  
8  
9 220

10 221 **Methods:**

11  
12 222 *Participants*

13  
14 223 The Middle Eastern or Arab community living in Canada is heterogeneous in terms of its  
15  
16 224 country of birth and religious affiliation. The main groups are Lebanese (41%), Egyptian  
17  
18 225 (12%), Syrian (6%), Moroccan (6%), and Iraqi (6%)[2]. Canadians of Arab origin are  
19  
20 226 equally divided between Muslims and Christians, of which the majority is Catholic[2].  
21  
22 227 The sociocultural heterogeneity within the Middle Eastern community is essential to  
23  
24 228 acknowledge, especially because religious beliefs impose dietary restrictions and may  
25  
26 229 influence psychosocial factors related to health in Arab Muslims [21, 37].  
27  
28 230

29 231 The target population of this study is an established Catholic Middle Eastern community  
30  
31 232 living in Montreal, Canada. This population is composed of first and second generation  
32  
33 233 migrants, mostly from Egypt, Lebanon and Syria. Recruitment and data collection  
34  
35 234 occurred at three Catholic Middle Eastern churches located in Montreal. Participation  
36  
37 235 was solicited through public announcements and was limited to one respondent per  
38  
39 236 household to avoid bias related to family customs. Subjects were all volunteers and could  
40  
41 237 withdraw from the study at any point.  
42  
43 238

44 239 The research protocol was submitted and approved by the ethics committee of the Centre  
45  
46 240 Hospitalier de l'Université de Montréal (SL 06-063). All participants provided informed  
47  
48 241 written consent.  
49  
50 242

51 243 *Instruments*

52 244 Socio-demographic characteristics were collected using a self-reported questionnaire  
53  
54 245 adapted from Health Canada[38]. Physical activity was assessed by asking the question  
55  
56 246 "how many times per week do you exercise enough to sweat? ". Participants self-reported  
57  
58 247 height and weight. Food consumption was assessed using a food frequency questionnaire  
59  
60



1  
2  
3 248 (FFQ) previously developed and validated with the study community to measure  
4  
5 249 consumption of 26 different sweet food and drink products [7]. To answer the FFQ,  
6  
7 250 respondents reported the average number of days per week, in a typical week, in which  
8  
9 251 each listed product was eaten or drank (i.e., excluding festivities). Participants were also  
10  
11 252 asked to report how many portions of the food item they typically ate. Examples of  
12  
13 253 portions sizes were taken from the Canadian Nutrient File (CNF) and provided to  
14  
15 254 participants[39]. For the purpose of this study, we selected food items representing sweet  
16  
17 255 products, which include cookies, chocolate, cakes and candies.  
18

19 257 Daytime sleepiness was measured using the *Epworth Sleepiness Scale* (ESS)[40]. This  
20  
21 258 self-report instrument contains eight items describing situations conducive to daytime  
22  
23 259 sleepiness. Respondents expressed their perceived likelihood of falling asleep in a  
24  
25 260 number of situations using a four-point scale (0 to 3). The ESS instrument has a high  
26  
27 261 internal consistency (Cronbach's alpha = 0.88) and a high test-retest reliability ( $r =$   
28  
29 262 0.82)[41].  
30

31 264 Psychological distress was measured using the *Kessler Psychological Distress Scale*  
32  
33 265 (K10)[42]. This instrument is composed of 10 questions on anxiety and depressive  
34  
35 266 symptomology. Respondents self-reported the degree to which they had these feelings for  
36  
37 267 the month prior to completing the instrument using a five-point Likert scale (all the time,  
38  
39 268 often, sometimes, rarely, never). Scores, ranging from 10 to 50, represent an increasing  
40  
41 269 gradient of psychological distress.  
42

#### 43 270

#### 44 271 *Analysis*

45 272 Data were analyzed using SPSS (Version 18.0). As a first step, we present descriptive  
46  
47 273 data on the consumption of sweet products according to sex, age, body mass index  
48  
49 274 (BMI), daytime sleepiness, and psychological distress. Consumption of sweet products  
50  
51 275 corresponded to the daily amount of total sugars eaten from cakes, cookies, chocolate,  
52  
53 276 and candies. This was calculated using data on the frequency and portions consumed  
54  
55 277 from these products obtained from the FFQ, and the estimated amount of total sugars  
56  
57 278 contained in mean portions of these products using CNF.  
58  
59  
60

1  
2  
3 279 For descriptive purposes, daytime sleepiness scores on the ESS were coded into three  
4  
5 280 levels of increasing daytime sleepiness: low (ESS scores 0-5), intermediate (ESS scores  
6  
7 281 6-11) and high (ESS scores 12-24). Intermediate (6-11) and high (12-24) ESS scores  
8  
9 282 were shown to have a 30% and 69% increased risk for sleep onset during the Multiple  
10  
11 283 Sleep Latency Test (MSLT), an objective measure of daytime sleep tendency[43].

12 284 Psychological distress scores on the K10 were grouped into standard groups as low (10-  
13  
14 285 20), moderate (21-29) and high levels of psychological distress (30-50)[42]. BMI was  
15  
16 286 calculated as weight (kg)/ height (m)<sup>2</sup> and categorized as normal weight (BMI < 25);  
17  
18 287 overweight  $25 \leq \text{BMI} < 30$ ; and obese (BMI > 30) [44].

19 288

20  
21 289 As a second step, univariate regression analysis was performed to estimate the  
22  
23 290 associations between consumption of sweet products and age, sex, BMI, daytime  
24  
25 291 sleepiness and psychological distress. Similar tests were performed to verify if the  
26  
27 292 consumption of sweet products varied by other socio-demographics (country of birth,  
28  
29 293 time since migration, family income, education level, civil status and employment status).

30 294 For all regression analyses, consumption of sweet products was log-transformed. Age,  
31  
32 295 daytime sleepiness and psychological scores were normally distributed and used as  
33  
34 296 continuous measures.

35 297

36  
37 298 Next, we applied the Baron and Kenny [30] criteria to assess whether the relationship  
38  
39 299 between daytime sleepiness (independent variable) and consumption of sweet products  
40  
41 300 (dependent variable) was mediated by psychological distress (mediator). According to  
42  
43 301 Baron and Kenny four statistical conditions need to be met in order to establish  
44  
45 302 mediation[30]. First, univariate regression was used to test if daytime sleepiness was  
46  
47 303 significantly associated with consumption of sweet products. Second, we assessed  
48  
49 304 whether daytime sleepiness and psychological distress were significantly associated.  
50  
51 305 Third, we tested whether psychological distress (mediator) was associated with the  
52  
53 306 consumption of sweet products when both daytime sleepiness and psychological distress  
54  
55 307 and were entered as predictors in a multivariate regression analysis. Fourth, we verified  
56  
57 308 that the coefficient relating daytime sleepiness to consumption of sweet products was  
58  
59 309 larger (in absolute value) than the coefficient relating both variables in the multivariate  
60

1  
2  
3 310 regression model when the mediating variable was entered. The Sobel test was used to  
4  
5 311 statistically evaluate whether the indirect effect of the independent variable on the  
6  
7 312 dependent variable through the mediator variable was significant[45].  
8  
9 313

10 314 As a final step, we ran alternative mediation models to rule out plausible competing  
11  
12 315 interpretations of the data and to verify whether our hypothesized model best fit the data.  
13  
14 316 First, daytime sleepiness was entered as the mediator of the relationship between  
15  
16 317 psychological distress (independent) and consumption of sweet products (dependent). In  
17  
18 318 a second alternative model, consumption of sweet products was entered as the mediator  
19  
20 319 of the relationship between daytime sleepiness (independent variable) and psychological  
21  
22 320 distress (dependent variable).  
23

24 321

## 25 322 **Results**

26 323 Participants were aged between 18 and 60 years (Mean = 34.6; SD = 12.5). There were  
27  
28 324 slightly more women (n=101) than men (n=85). Country of birth included Egypt (31.9  
29  
30 325 %), Lebanon (25.1 %), Syria (14.7 %), and other Middle Eastern countries (5.3 %).  
31  
32 326 Individuals migrated between 1962 and 2007, of which 86% arrived before 2000,  
33  
34 327 meaning they have spent more than 10 years in Canada. An additional 23.0% of subjects  
35  
36 328 were born in Canada; these were second-generation migrants (i.e., children of  
37  
38 329 immigrating parents born in the Middle Eastern). Participant's civil status was as follows;  
39  
40 330 married or engaged (47.3%), single (46.2%), separated/divorced (4.3%), and widowed  
41  
42 331 (2.2%). The vast majority of respondents had at least a college diploma (88.0%), and  
43  
44 332 most had a university degree (65.8%). Most participants had a family income above CAD  
45  
46 333 \$50,000 (66.9%).  
47

48 334

49 335 Average consumption of sweet products was of 15.5 g/day (SD=13.9; N = 186) with the  
50  
51 336 range from 0 to 93.1 g/day. The share of each food item to the amount of total sugars  
52  
53 337 from these products was as follows; cakes (51.3%), chocolate (24.7%), cookies (16.1%)  
54  
55 338 and candies (7.9 %).  
56

57 339  
58  
59  
60

1  
2  
3 340 The average daytime sleepiness score on ESS was 8.2 (SD= 4.5) (N=186). A third of  
4  
5 341 individuals (30.1%) had a low daytime sleepiness score (0-5) and half (50.5%) had an  
6  
7 342 intermediate daytime sleepiness score (6-11). One-fifth of individuals (19.5%) had a high  
8  
9 343 daytime sleepiness score (12-24). Almost one-third of individuals met the clinical criteria  
10  
11 344 for excessive daytime sleepiness (EDS) (defined as ESS scores above 10). Daytime  
12  
13 345 sleepiness did not vary by sex, age or BMI.

14  
15 346

16 347 The average psychological distress score on the K10 was 20.8 (SD= 6.2) (N=186).  
17  
18 348 More than one half the respondents (55.4%) had a low distress score of 0-20; one-third  
19  
20 349 (32.8%) had a moderate distress score of 21-30; and one-tenth had a high distress score of  
21  
22 350 30-50 (11.8%). Psychological distress did not vary by sex, age or BMI.

23  
24 351

25 352 Table 1 presents descriptive data on the consumption of sweet products according to age,  
26  
27 353 sex, physical activity, BMI, daytime sleepiness, and psychological distress. Females  
28  
29 354 consumed slightly more sweet products than males (1.7g/day), while patterns for age and  
30  
31 355 BMI were less defined. Importantly, the consumption of sweet products varied according  
32  
33 356 to psychological distress and daytime sleepiness score levels. Individuals with high  
34  
35 357 distress ate an additional 5.6g of total sugars/day, 45% more than individuals with  
36  
37 358 moderate distress, and an additional 8.5g of total sugars/day, 68% more than individuals  
38  
39 359 with low distress. Individuals with high daytime sleepiness (>12) ate an additional 2.9g  
40  
41 360 of total sugars/day, 23% more than subjects with moderate daytime sleepiness, and an  
42  
43 361 additional 6.9g of total sugars/day, 54% more than individuals with low daytime  
44  
45 362 sleepiness. Other socio-demographics were not related statistically to the consumption of  
46  
47 363 sweet products.

48  
49 364

50 365 Table 1 also presents the results of univariate analyses between consumption of sweet  
51  
52 366 products (log-transformed) and age, sex, BMI, daytime sleepiness, and psychological  
53  
54 367 distress. Consumption of sweet products did not vary significantly by age, sex or BMI.

55 368 The consumption of sweet products was positively associated with psychological distress  
56  
57 369 ( $p<0.00$ ), as well with daytime sleepiness ( $p<0.03$ ).

58  
59 370  
60

1  
2  
3 371 Multivariate analysis (Table 2) consisted of simultaneous modeling daytime sleepiness  
4  
5 372 and psychological distress. In this model, the association between psychological distress  
6  
7 373 and consumption of sweet products remained statistically significant ( $p<0.01$ ) whereas  
8  
9 374 the relationship with daytime sleepiness was not significant ( $p<0.08$ ).  
10

11 375

12 376 We were able to verify all four steps required by the Baron and Kenny[30] to establish  
13  
14 377 mediation. First, daytime sleepiness was significantly associated with the consumption of  
15  
16 378 sweet products ( $p<0.03$ ). Second, daytime sleepiness and psychological distress were  
17  
18 379 significantly correlated ( $r=0.197$ ;  $p<0.04$ ). Third, psychological distress was associated  
19  
20 380 with the consumption of sweet products ( $p<0.01$ ) when both psychological distress and  
21  
22 381 daytime sleepiness were entered as predictors in the multivariate regression model.

23 382 Fourth, the coefficient relating daytime sleepiness to consumption of sweet products was  
24  
25 383 larger ( $\beta=0.05$ ) than the coefficient relating daytime sleepiness to consumption of sweet  
26  
27 384 products ( $\beta=0.03$ ) with both daytime sleepiness and psychological distress entered in the  
28  
29 385 multivariate regression model. Finally, the Sobel test showed that the indirect effect of  
30  
31 386 the independent variable on the dependent variable through the mediator variable was  
32  
33 387 significant (Sobel statistic=2.14; SE=0.01;  $p<0.03$ ).  
34

35 388

36 389 In order to strengthen the robustness of the results, two alternative mediation models  
37  
38 390 were tested. In the first alternative model, Baron and Kenny's third criteria was not  
39  
40 391 satisfied. Indeed, daytime sleepiness (mediator) was not associated ( $p<0.15$ ) with  
41  
42 392 psychological distress (dependent) when both daytime sleepiness and consumption of  
43  
44 393 sweet products (independent) were entered as predictors in a multivariate regression  
45  
46 394 analysis. In the second alternative model, all of Baron and Kenny's criteria were satisfied.  
47  
48 395 However, comparing both models using Akaike information criterion (AIC) indicated  
49  
50 396 that the hypothesized mediation model (AIC=848) is a far better fit than this second  
51  
52 397 alternative model (AIC=1205). Furthermore, the Sobel test for the second alternative  
53  
54 398 mediation model showed that the indirect effect of the independent variable on the  
55  
56 399 dependent variable through the mediator variable was not significant (Sobel statistic=1.63  
57  
58 400 SE=0.12;  $p<0.1$ ).  
59  
60 401

1  
2  
3 4024  
5 4036  
7 404 **Discussion**

8 405 The data presented in this paper show that the level of daytime sleepiness in the Catholic  
9 406 Middle Eastern Canadian community is statistically associated with higher consumption  
10 407 of sweetened products, such as chocolate, candies, cakes and cookies. Most importantly,  
11 408 we found that this relationship is partially mediated by the level of psychological distress.

12  
13  
14 409

15  
16  
17 410 The strengths of this study are the use of well-established procedures to assess mediation  
18 411 - Baron and Kenny's (1986) four-step approach and the Sobel test, and the testing of  
19 412 alternative mediating models. Our analysis, however, was based on assumptions of  
20 413 having a correctly specified mediation model, including no misspecifications of causal  
21 414 order and of causal direction, or of imperfect measurements and unmeasured variables  
22 415 [46]. In reality, such assumptions are difficult or even impossible to achieve. By testing  
23 416 alternative mediate models we showed that the one we described is the best fitted to  
24 417 account for the relationship between these three variables. Furthermore, data from prior  
25 418 research support the proposition that a mediation relation exists between these variables.

26  
27  
28 419

29 420 The relationship observed between daytime sleepiness and consumption of food high in  
30 421 dietary sugars is consistent with previous studies conducted in western and non-western  
31 422 settings [27-29]. Similarly, previous work provides strong support that the consumption  
32 423 of sweetened products is triggered by negative emotional or distress feelings in western  
33 424 populations. Negative mood (as measured by anxiety, fatigue and depression scales) has  
34 425 been correlated with craving intensity for sweet food [36]. Experimental studies have also  
35 426 demonstrated an association between stress or negative mood and the consumption of  
36 427 savory foods in emotional eaters [35, 47]. Thus one explanation in support of our  
37 428 mediating model is that individuals who experience daytime sleepiness may consume  
38 429 energy dense sugary rich foods to upgrade their energy level or to alleviate their negative  
39 430 mood or psychological distress. This explanation fits with the fueling and emotional  
40 431 functions attributed to sweetened food and drink products by members of the studied  
41 432 community in semi-structured interviews [7]. Furthermore, this explanation has

1  
2  
3 433 biological plausibility since sweet taste may alleviate dysphoric mood or stress through  
4 434 dopaminergic and opioidergic neurotransmission in the brain [13-15].  
5  
6  
7 435

8 436 Our study highlights that sleep, mood and diet are interconnected, and that efforts to  
9 437 improve diet quality must consider the psychosocial well-being of individuals, especially  
10 438 given the known properties of sweets to temporarily alleviate fatigue, stress and anxiety.  
11 439 These results have important public health implications for the prevention of obesity and  
12 440 chronic diseases, which are growing concerns in the Arab Canadian community[3].  
13 441 Indeed, consumption of processed products high in dietary sugars is recognized as an  
14 442 important contributor to the development of these diseases[6]. As reported elsewhere, the  
15 443 consumption level of total sugars (all foods considered), ~ 20% of diet, in this community  
16 444 is now similar that of the Canadian and Quebec population[7]. The average daytime  
17 445 sleepiness score (8.2) and the prevalence of EDS (28%) measured in this paper are within  
18 446 the range noted in western countries[48]. The obesity prevalence of 15.6% is also similar  
19 447 to the Canadian average and the general Arab community, when self-reported measures  
20 448 are taken[3].  
21  
22  
23  
24  
25  
26  
27  
28  
29  
30  
31  
32 449

33 450 The prevalence of high psychological distress (K10>30) at 11.8% is nearly half that of  
34 451 the Canadian average, reported to be 20.7% [49]. It is possible that sociocultural factors  
35 452 such as family social support or having a religious faith protect against anxiety and  
36 453 depression. Religious affiliation, for example, is higher in the Middle Eastern community  
37 454 (94%) than in the overall population (83%)[2]. Also, the strength and size of social  
38 455 network shown to have tempering effect on weight gain and the general health of  
39 456 individuals living in large Canadian ethnic groups [5]. The sources of psychological  
40 457 distress in the Middle Eastern Canadian community are, however, unknown and warrant  
41 458 future research. Socioeconomic difficulties do not seem to play an essential role in our  
42 459 population sample, since employment rate, education level and household income were  
43 460 found to be relatively high. The difficulties of maintaining traditional dietary practices in  
44 461 the host country may be potential sources of social and economic stress [7, 21].  
45  
46  
47  
48  
49  
50  
51  
52  
53  
54  
55 462

1  
2  
3 463 This study has limitations. First, the sample size was small and thus statistical power was  
4  
5 464 limited. However, the composition of our sample reflects the characteristics of the  
6  
7 465 general Catholic Middle Eastern Canadian community in terms of birthplace, religious  
8  
9 466 affiliation, education and income[2]. Our findings, however, cannot be generalized to the  
10  
11 467 Muslim Arab Canadian community. Second, the study is based on self-reported  
12  
13 468 subjective measures. However, both instruments we used (ESS and K10) are valid and  
14  
15 469 reliable instruments widely used in both sleep and mood-related studies. Third, we did  
16  
17 470 not account for other sleep problem measures, including duration of sleep and sleep  
18  
19 471 deprivation, as well as other potential confounding disorders. Sleep duration and  
20  
21 472 obstructive sleep apnea are the most common causes of daytime sleepiness[22], but  
22  
23 473 studies examining the relationships between sleep duration, dietary intake and obesity has  
24  
25 474 produced mixed results[50]. Fourth, findings are based on cross-sectional data. Therefore,  
26  
27 475 it is impossible to know the causal order of the observed associations, and the existence  
28  
29 476 of bi-directional effects, for example, between the consumption of foods high in dietary  
30  
31 477 sugars and daytime sleepiness.

30 478  
31  
32 479

### 33 480 **Conclusion**

35 481 This study expands the limited evidence base concerning the association between  
36  
37 482 consumption of sweetened products, daytime sleepiness and psychological distress in any  
38  
39 483 communities including migrants ones. One novel contribution of this study is its  
40  
41 484 inclusion of a measure of psychological distress and the use of Baron and Kenny's  
42  
43 485 [30]four-step approach and the Sobel test to establish that the consumption of sweetened  
44  
45 486 products and daytime sleepiness is partially mediated by psychological distress. One  
46  
47 487 possible explanation in support of this relationship is that individuals experiencing  
48  
49 488 daytime sleepiness may reach for energy dense sugary rich foods in order to upgrade their  
50  
51 489 energy level or to alleviate their psychological distress. Further work is needed to test this  
52  
53 490 mediation hypothesis, and to identify the potential sources of anxiety and depression  
54  
55 491 amongst the Arab Canadian population.

55 492



493 **Table 1** Consumption of sweetened products (total sugars/day) according to psychosocial distress  
 494 and daytime sleepiness scores (N=186).

| Factors                             | Subjects |      | Sweetened products (g/day) |     | P <* |
|-------------------------------------|----------|------|----------------------------|-----|------|
|                                     | N        | %    | Mean                       | SE  |      |
| Sex                                 |          |      |                            |     | 0.66 |
| Male                                | 85       | 45.7 | 14.6                       | 1.5 |      |
| Female                              | 101      | 54.3 | 16.3                       | 1.4 |      |
| Age                                 |          |      |                            |     | 0.59 |
| 18-30                               | 83       | 44.6 | 19.5                       | 1.6 |      |
| 31-40                               | 50       | 26.9 | 12.7                       | 1.7 |      |
| 41-50                               | 21       | 11.3 | 17.2                       | 4.2 |      |
| 51-60                               | 32       | 17.2 | 12.4                       | 1.8 |      |
| Physical activity                   |          |      |                            |     | 0.33 |
| 0                                   | 65       | 35.0 | 16.8                       | 1.6 |      |
| 1-2 /week                           | 73       | 39.2 | 15.6                       | 1.7 |      |
| 3-4 /week                           | 48       | 25.8 | 13.6                       | 2.2 |      |
| Body mass index                     |          |      |                            |     | 0.86 |
| Normal (18.5-24.9)                  | 88       | 44.6 | 16.5                       | 1.5 |      |
| Overweight (25-29.9)                | 69       | 37.1 | 13.6                       | 1.4 |      |
| Obese(>30)                          | 29       | 15.6 | 17.1                       | 3.3 |      |
| Psychological distress (K10 scores) |          |      |                            |     | 0.00 |
| Low (10-20)                         | 103      | 55.4 | 12.7                       | 1.1 |      |
| Moderate (21-30)                    | 61       | 32,8 | 18.3                       | 1.8 |      |
| High (30-50)                        | 22       | 11,8 | 21.2                       | 4.3 |      |
| Daytime sleepiness (ESS scores)     |          |      |                            |     | 0.03 |
| Low (0-5)                           | 56       | 30,1 | 12.7                       | 1.5 |      |
| Moderate (6-11)                     | 94       | 50,5 | 15.6                       | 1.5 |      |
| High (12-24)                        | 36       | 19,4 | 19.6                       | 2.3 |      |

497 \*In the univariate regression analysis, sweetened products was log-transformed and all variables were  
 498 entered as continuous (age, BMI, psychological distress scores (10-50) and daytime sleepiness scores (0-  
 499 24). T-test performed for sex. Physical activity categories were created by asking "how many times per  
 500 week do you exercising enough to sweat?" and answers range from 0-4 times per week.

501  
502  
503  
504  
505  
506  
507  
508  
509  
510

1  
2  
3 511  
4 512 **Table 2** Relationships between consumption of sweetened products, daytime sleepiness and  
5 513 psychological distress in the multivariate model (N=186)  
6  
7 514

|                        | $\beta$ | SE   | T value | P<   |
|------------------------|---------|------|---------|------|
| Model 1(unadjusted)    | 0.05    | 0.02 | 1.15    | 0.04 |
| Model 2*               |         | 0.02 | 1.15    | 0.04 |
| Intercept              | 0.97    | 0.37 | 2.62    | 0.01 |
| Daytime sleepiness     | 0.03    | 0.02 | 1.74    | 0.08 |
| Psychological distress | 0.05    | 0.02 | 2.70    | 0.01 |

17  $\beta$  = Beta coefficient; SE=standard error.  $R^2$  =0.06

18 Consumption of sweetened products was log-transformed. Psychological distress scores (10-50) and daytime  
19 sleepiness scores (0-24) are entered as continuous and are normally distributed.

20 \*model adjusted for psychological distress (mediator), and covariates (age, sex, physical activity and BMI)

21 515

22 516

23 517

### 24 517 **Data Sharing**

25 518 Original data for this paper is available from the corresponding author

26 519

27 520

### 27 520 **Contributorship**

28 521 The study was developed and designed by all authors, and supervised by MD. Data  
29 522 preparation and analysis was undertaken by JCM, MC, and OR. The initial draft of the  
30 523 paper was prepared by JCM, following extensive discussions with MC, OR MD.

31 524 Successive drafts were developed by JCM, with inputs from the other co-authors. All  
32 525 authors have reviewed and approved the final version.

34 526

35 527

36 528

37 529

38 530

39 531

40 532

41 533

42 534

43 535

44 536

45 537

46 538

47 539

48 540

49 541

50 542

51 543

52 544

53 545

54 546

55 546

56 546

57 546

58 546

59 546

60 546

1  
2  
3 547  
4 548  
5 549  
6 550  
7 551  
8 552  
9 553  
10 554  
11 555  
12 556  
13 557  
14 558  
15 559  
16 560  
17 561  
18 562  
19 563  
20 564  
21 565  
22 566  
23 567  
24 568  
25 569  
26 570  
27 571  
28 572  
29 573  
30 574  
31 575  
32 576  
33 577  
34 578  
35 579  
36 580  
37 581  
38 582  
39 583  
40 584  
41 585  
42 586  
43 587  
44 588  
45 589  
46 590  
47 591

## References

1. Tremblay MS, Perez CE, Ardern CI, et al. Obesity, overweight and ethnicity. *Health Rep* 2005; **16**:23-34
2. Health Canada. *The Arab community*. 2007 Ottawa: Canada.
3. Liu R, So L, Mohan S, et al. Cardiovascular risk factors in ethnic populations within Canada: results from national cross-sectional surveys 2010; *Open medicine*:e143-53
4. Nakanishi S, Okubo M, Yoneda M, et al. A comparison between Japanese-Americans living in Hawaii and Los Angeles and native Japanese: the impact of lifestyle westernization on diabetes mellitus. *Biomedicine & pharmacotherapy* 2004;**58**:571-7
5. McDonald JT, Kennedy S. Is migration to Canada associated with unhealthy weight gain? Overweight and obesity among Canada's immigrants. *Social science & medicine* 2005;**61**:2469-81
6. World Health Organization Diet. Nutrition and the Prevention of Chronic Diseases. Report of the joint WHO/FAO expert consultation. WHO Technical Report Series no. 916. 2003 Geneva: WHO.
7. Moubarac, J-C. Étude du comportement et des contextes associés à la consommation d'aliments sucrés dans une communauté montréalaise originaire du Moyen-Orient. 2011 Berlin, Germany: Editions Universitaires Européennes.
8. Monteiro CA, Levy RB, Claro RM, et al. A new classification of foods based on the extent and purpose of their processing. *Cad Saude Publica* 2010;**26**:2039-49
9. Chapelot D. The role of snacking in energy balance: a biobehavioral approach. *The Journal of nutrition* 2011;**141**:158-62
10. Lustig RH, Schmidt LA, Brindis CD. Public health: The toxic truth about sugar. *Nature* 2012;**482**:27-9
11. Drewnowski A. The real contribution of added sugars and fats to obesity. *Epidemiologic reviews* 2007;**29**:160-71
12. Levine AS, Kotz CM, Gosnell BA. Sugars: hedonic aspects, neuroregulation, and energy balance. *The American journal of clinical nutrition* 2003;**78**:834S-42S
13. Gibson, EL. Emotional influences on food choice: sensory, physiological and psychological pathways. *Physiology & Behavior* 2006;**89**:53-61
14. Adam TC, Epel ES. Stress, eating and the reward system. *Physiology & Behavior* 2007;**91**:449-58
15. Macht M. How emotions affect eating: A five-way model. *Appetite* 2008;**50**:1-11

- 1  
2  
3 592 16. Hassan-Wassef H. Food habits of the Egyptians: newly emerging trends. *Eastern*  
4 593 *Mediterranean health journal* 2004;**10**:898-915
- 5 594 17. Issa C, Salameh P, Batal M, et al. The nutrient profile of traditional Lebanese  
6 595 composite dishes: comparison with composite dishes consumed in France.  
7 596 *International journal of food sciences and nutrition* 2004;**60** Suppl 4:**285**-95
- 8 597 18. Parker S, Kamel N, Zellner D Food craving patterns in Egypt: comparisons with  
9 598 North America and Spain. *Appetite* 2003;**40**:193-5
- 10 599 19. Nasreddine L, Hwalla N, Sibai A, et al. Food consumption patterns in an adult  
11 600 urban population in Beirut, Lebanon. *Public health nutrition* 2006; **9**:194-203
- 12 601 20. Musaiger AO, Al-Hazzaa, HM. Prevalence and risk factors associated with  
13 602 nutrition-related noncommunicable diseases in the Eastern Mediterranean region.  
14 603 *International journal of general medicine* 2012;**5**:199-217
- 15 604 21. Vallianatos H, & Raine, K. Consuming Food and Constructing Identities among  
16 605 Arabic and South Asian Immigrant Women. *Food, Culture and Society* 2008;  
17 606 **11**:355-60
- 18 607 22. Panossian LA, Veasey, SC. Daytime sleepiness in obesity: mechanisms beyond  
19 608 obstructive sleep apnea--a review. *Sleep* 2012;**35**:605-15
- 20 609 23. Pagel JF. Excessive daytime sleepiness. *Am Fam Physician* 2009;**79**:391-6
- 21 610 24. Peterson, PC, Husain, AM. Pediatric narcolepsy. *Brain & development*  
22 611 2008;**30**:609-23
- 23 612 25. Newman AB, Spiekerman CF, Enright P, et al. Daytime sleepiness predicts  
24 613 mortality and cardiovascular disease in older adults. The Cardiovascular Health  
25 614 Study Research Group. *J Am Geriatr Soc* 2000;**48**:115-23
- 26 615 26. Vgontzas AN, Bixler EO, Chrousos GP. Sleep apnea is a manifestation of the  
27 616 metabolic syndrome. *Sleep Med Rev* 2005;**9**:211-24
- 28 617 27. Gaina A, Sekine M, Hamanishi S, et al. Daytime sleepiness and associated factors  
29 618 in Japanese school children. *The Journal of pediatrics* 2007;**151**:518-22, 22 e1-4
- 30 619 28. Husain AM, Yancy WS, Jr., Carwile ST, et al. Diet therapy for narcolepsy.  
31 620 *Neurology* 2004;**62**:2300-2
- 32 621 29. Cunliffe A, Obeid OA, Powell-Tuck J. Post-prandial changes in measures of  
33 622 fatigue: effect of a mixed or a pure carbohydrate or pure fat meal. *Eur J Clin Nutr*  
34 623 1997;**51**:831-8
- 35 624 30. Baron R, Kenny D. The moderator-mediator variable distinction in social  
36 625 psychological research: conceptual, strategic, and statistical considerations. *J Pers*  
37 626 *Soc Psychol* 1986;**51**:1173-82
- 38 627 31. Bixler EO, Vgontzas AN, Lin HM, et al. Excessive daytime sleepiness in a  
39 628 general population sample: the role of sleep apnea, age, obesity, diabetes, and  
40 629 depression. *J Clin Endocrinol Metab* 2005;**90**:4510-5
- 41 630 32. Chellappa SL, Araujo JF. Excessive daytime sleepiness in patients with  
42 631 depressive disorder. *Rev Bras Psiquiatr* 2006;**28**:126-9
- 43 632 33. Mume CO Excessive daytime sleepiness among depressed patients. *Libyan J Med*  
44 633 2010; **5**:doi 10.4176/091024.
- 45 634 34. Theorell-Haglow J, Lindberg E, Janson C. What are the important risk factors for  
46 635 daytime sleepiness and fatigue in women? *Sleep* 2006;**29**:751-7

- 1  
2  
3 636 35. Macht M, Mueller J. Interactive effects of emotional and restrained eating on  
4 637 responses to chocolate and affect. *The Journal of nervous and mental disease*  
5 638 2007;**195**:1024-6  
6  
7 639 36. Christensen L, Pettijohn L. Mood and carbohydrate cravings. *Appetite*  
8 640 2001;**36**:137-45  
9 641 37. Sabate J. Religion, diet and research. *The British journal of nutrition* 2004;**92**:199-  
10 642 201  
11 643 38. Statistics Canada Enquête sur la santé dans les collectivités canadiennes (ESCC).  
12 644 Questionnaire pour Cycle 2.1. [http://www.statcan.gc.ca/concepts/health-](http://www.statcan.gc.ca/concepts/health-sante/cycle2_1/pdf/cchs-escc-fra.pdf)  
13 645 [sante/cycle2\\_1/pdf/cchs-escc-fra.pdf](http://www.statcan.gc.ca/concepts/health-sante/cycle2_1/pdf/cchs-escc-fra.pdf). 2003. Accessed 4 June 2011.  
14 646 39. Health Canada. Canadian Nutrient File. [http://webprod3.hc-sc.gc.ca/cnf-](http://webprod3.hc-sc.gc.ca/cnf-fce/index-eng.jsp)  
15 647 [fce/index-eng.jsp](http://webprod3.hc-sc.gc.ca/cnf-fce/index-eng.jsp). Accessed May 2 2011.  
16 648 40. Johns MW. A new method for measuring daytime sleepiness: the Epworth  
17 649 sleepiness scale. *Sleep* 1991;**14**:540-5  
18 650 41. Johns MW. Reliability and factor analysis of the Epworth Sleepiness Scale. *Sleep*  
19 651 1992;**15**:376-81  
20 652 42. Kessler RC, Andrews G, Colpe LJ, et al. Short screening scales to monitor  
21 653 population prevalences and trends in non-specific psychological distress. *Psychol*  
22 654 *Med* 2002;  
23 655 **32**:959-76  
24 656 43. Snyderman NL, Johnson JT, Moller M, et al. Brainstem evoked potentials in adult  
25 657 sleep apnea. *The Annals of otology, rhinology, and laryngology* 1982;**91**:597-8  
26 658 44. Pi-Sunyer FX. Obesity: criteria and classification. *Proc Nutr Soc* 2000;**59**:505-9  
27 659 45. Sobel ME. Asymptotic confidence intervals for indirect effects in structural  
28 660 equation models. *Sociological Methodology* 1982;**13**:290-312  
29 661 46. MacKinnon DP, Fairchild AJ, Fritz MS. Mediation analysis. *Annu Rev Psychol*  
30 662 2007;**58**:593-614  
31 663 47. Oliver G, Wardle J, Gibson EL. Stress and food choice: a laboratory study.  
32 664 *Psychosom Med* 2000;**62**:853-65  
33 665 48. Muzet A, Johnson LC, Spinweber CL. Benzodiazepine hypnotics increase heart  
34 666 rate during sleep. *Sleep* 1982;**5**:256-61  
35 667 49. Caron J, Liu A. A descriptive study of the prevalence of psychological distress  
36 668 and mental disorders in the Canadian population: comparison between low-  
37 669 income and non-low-income populations. *Chronic Dis Can* 2010;**30**:84-94  
38 670 50. Nishiura C, Noguchi J, Hashimoto H. Dietary patterns only partially explain the  
39 671 effect of short sleep duration on the incidence of obesity. *Sleep* 2010;**33**:753-7  
40 672  
41 673  
42 674  
43 675  
44 676  
45 677  
46 678  
47 679

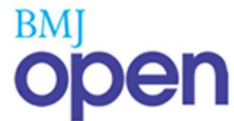

**Psychological distress mediates the association between daytime sleepiness and consumption of sweetened products: Cross-sectional findings in a Catholic Middle Eastern Canadian community**

|                                 |                                                                                                                                                                                         |
|---------------------------------|-----------------------------------------------------------------------------------------------------------------------------------------------------------------------------------------|
| Journal:                        | <i>BMJ Open</i>                                                                                                                                                                         |
| Manuscript ID:                  | bmjopen-2012-002298.R1                                                                                                                                                                  |
| Article Type:                   | Research                                                                                                                                                                                |
| Date Submitted by the Author:   | 12-Jan-2013                                                                                                                                                                             |
| Complete List of Authors:       | Moubarac, Jean-Claude; Université de Montréal, Cargo, Margaret; University of South Australia, Receveur, Olivier ; Université de Montréal, Daniel, Mark; University of South Australia, |
| <b>Primary Subject Heading</b>: | Public health                                                                                                                                                                           |
| Secondary Subject Heading:      | Epidemiology                                                                                                                                                                            |
| Keywords:                       | Migrant, Middle Eastern Canadian, sweetened foods, daytime sleepiness, psychological distress, mediation analysis                                                                       |
|                                 |                                                                                                                                                                                         |

SCHOLARONE™  
Manuscripts

1  
2  
3  
4 1 Psychological distress mediates the association between daytime  
5 2 sleepiness and consumption of sweetened products: Cross-  
6 3 sectional findings in a Catholic Middle Eastern Canadian  
7 4 community.  
8  
9

10 5  
11 6 **Jean-Claude Moubarac<sup>a</sup>, PhD, Margaret Cargo<sup>b</sup>, PhD, Olivier**  
12 7 **Receveur<sup>c</sup>, PhD and Mark Daniel<sup>b</sup>, PhD**  
13 8

14 9  
15  
16 9 <sup>a</sup> École de Santé Publique, Université de Montréal, 1420, boul.Mont-Royal, Montréal  
17 10 (Québec) H2V 4P3, Canada. <sup>b</sup> School of Health Sciences, University of South Australia,  
18 11 GPO Box 2471, Adelaide SA 5001, Australia, <sup>c</sup> Département de Nutrition, Université de  
19 12 Montréal, 2405, Ch.de la Côte-Sainte-Catherine, Montréal (Québec) H3T 1A8, Canada.  
20 13  
21 14

22 15  
23 16 **Institution where the work was performed:** École de Santé Publique, Université de  
24 17 Montréal, 1420, boul.Mont-Royal, Montréal (Québec) H2V 4P3, Canada  
25 18

26 19 **Corresponding author (Jean-Claude Moubarac): [jcmoubarac@gmail.com](mailto:jcmoubarac@gmail.com)**  
27 20 Núcleo de Pesquisas Epidemiológicas em Nutrição e Saúde, Universidade de São Paulo,  
28 21 Av. Dr. Arnaldo 715, 01246-904, São Paulo, SP, Brasil. Tel: 55-11-2592-2572  
29 22  
30 23

31 24  
32 25  
33 26  
34 27  
35 28  
36 29  
37 30  
38 31  
39 32  
40 33  
41 34  
42 35  
43 36  
44 37  
45 38  
46 39  
47 40  
48 41  
49 42  
50 43  
51 44  
52 45  
53 46  
54 47  
55 48  
56 49  
57 50  
58 51  
59 52  
60 53

Word count : 4526

26 No funding was received for this study. The authors report no conflict of interests.  
27  
28  
29  
30  
31  
32  
33  
34  
35  
36  
37  
38

**Abstract**

Objective: To examine the associations between consumption of sweetened products, daytime sleepiness (DS) and psychological distress (PD) in a Catholic Middle Eastern Canadian community, and to test the hypothesis that the association between DS and consumption of sweetened products is mediated by PD.

Design: Cross-sectional study

Setting: A Catholic Middle-Eastern Canadian community

Participants: 186 men and women aged between 18-60 years old

Primary and secondary outcome measures: Sweetened product consumption was measured using a food frequency questionnaire (total sugars/day). DS and PD were measured using standardized questionnaire. The generalised linear model was used to estimate associations between sweetened product consumption, age, sex, self-reported body mass index, DS and PD. Baron and Kenny's four-step approach in addition to the Sobel test were used to establish mediation.

Results: Average DS score was 8.2 (SD= 4.5) with 19.5% having excessive scores (>12). Mean PD score was 20.8 (SD= 6.2) with 11.8% having high distress scores. Average consumption of sweetened products was 15.5 g/day (SD=13.9). Baron and Kenny's three steps to establish partial mediation were confirmed. First, DS was associated with consumption of sweetened products ( $p<0.03$ ). Second, DS and PD were correlated ( $r=0.197$ ;  $p<0.04$ ). Third, PD was associated with consumption of sweetened products ( $p<0.01$ ) when both PD and DS were entered as predictors in a multivariate regression. However, Baron and Kenny's fourth step to establish complete mediation was not met. The effect of DS on consumption of sweetened products controlling for PD was reduced but it was not zero. Finally, the Sobel test was significant (2.14;  $p<0.03$ ).

Conclusion: The association between daytime sleepiness and consumption of sweetened products in the Catholic Middle Eastern Canadian community is partially mediated by psychological distress. Further work should test this mediation relationship in larger samples and verify the potential effects of other sleep variables in this relationship.

Key words: Migrants, Middle Eastern Canadian, sweetened products, dietary sugars, daytime sleepiness, sleep, psychological distress, depression, mediation analysis.



1  
2  
3  
4  
5  
6  
7  
8  
9  
10  
11  
12  
13  
14  
15  
16  
17  
18  
19  
20  
21  
22  
23  
24  
25  
26  
27  
28  
29  
30  
31  
32  
33  
34  
35  
36  
37  
38  
39  
40  
41  
42  
43  
44  
45  
46  
47  
48  
49  
50  
51  
52  
53  
54  
55  
56  
57  
58  
59  
60

85 Article focus:

- 86 • This study examines the association between consumption of sweetened products,  
87 daytime sleepiness and psychological distress in a Catholic Middle Eastern  
88 Canadian community  
89 • We use Baron and Kenny's (1986) four-step approach and the Sobel test to  
90 examine alternative mediating models between these three variables

91 Key messages

- 92 • Daytime sleepiness is associated to the consumption of sweetened products and  
93 this association is partially mediated by psychological distress  
94 • This study highlights that sleep, mood and diet are interconnected, and that efforts  
95 to improve diet quality must consider the psychosocial well-being of individuals

96 Strength and limitations

- 97 • The strengths include the testing of alternative mediating models and the use of  
98 well-established procedures to assess mediation  
99 • Due to the cross-sectional nature of the study it is impossible to know the causal  
100 order of the observed associations, and the existence of bi-directional effects  
101 • Further work is needed to test this mediation relationship in larger samples and to  
102 verify the potential effects of sleep duration and quality of sleep in this  
103 relationship.  
104

## 126 Introduction

127 The prevalence of overweight/obesity and chronic diseases, as well as their associated  
128 risk factors, vary dramatically by ethnic groups in Canada[1]. Canadians of Arab (or  
129 Middle East) origin<sup>1</sup> represent more than 1.2% of the total Canadian population[2] and  
130 comprise one of the largest non-European ethnic groups in Canada. After adjusting for  
131 socioeconomic factors, Arab Canadians are less likely to be obese than Black, Latin, and  
132 Aboriginal groups, however more likely to be obese than Chinese, Japanese, South Asian  
133 groups, as well as the White reference group [3]. Furthermore, the prevalence of obesity  
134 is much higher amongst long-term Arab migrants ( $\geq 11$  or more years) than the more  
135 recent migrants ( $\leq 10$  years) to Canada[1]. The high prevalence of obesity amongst Arabs  
136 and the finding that the prevalence increases with time may result from the adoption of  
137 dietary and behavioural risk factors uncommon to the environment of their home  
138 countries prior to migration and acquired during the acculturation process in Canada[1, 4,  
139 5].

140  
141 A modifiable dietary risk factor contributing to the development of obesity is the  
142 consumption of ultra-processed products high in dietary sugars, or sweet food and drink  
143 products [6]. Such products include soft drinks, sweetened juices and beverages, candies  
144 and chocolates, sugary baked goods, ice creams, and other desserts[7]. These products  
145 share many nutritional characteristics that make them unhealthy; they are energy dense  
146 (for solids), they have an excessive content in free sugars, and some are also high in fats  
147 and saturated fats[8]. Furthermore, they are sold in large portion sizes and are commonly  
148 consumed as snacks both of which may contribute to energy imbalance[9]. Even more  
149 problematic is the fact that sweetened products have specific psychological properties  
150 that trigger consumption; they are hyper-palatable [10-12] and their sweet taste works to  
151 alleviate dysphoric mood or stress through dopaminergic and opioidergic neuro-  
152 transmission in the brain[13-15].

153

---

<sup>1</sup> Denotes people from the Middle East or North African region who reported Arab (or an origin that originates in the region commonly referred to as the Arab world), either alone or in combination with other ethnic origins in response to the question on ethnic origin in the 2001 Census or 2002 Ethnic Diversity Survey. In this paper, the terms Arab and Middle Eastern are used interchangeably.

1  
2  
3 154 Middle Easterners are known for the daily consumption of sweet tea. However, other  
4  
5 155 sweetened products have a secondary role in traditional Middle Eastern cuisine in that  
6  
7 156 they are mostly home-prepared pastries and deserts most frequently consumed during  
8  
9 157 festivities and on special occasions [16, 17]. Young Egyptian women and men more often  
10  
11 158 reported cravings for savories (meat and vegetables based dishes) than cravings for  
12  
13 159 sweets, contrary to studies conducted in Canada and United States [18]. However, the  
14  
15 160 quantity, use and significance of sweetened products have significantly changed in the  
16  
17 161 last decades in Lebanon, Egypt and Syria, with a parallel increase in obesity and chronic  
18  
19 162 diseases [16, 19, 20]. Similarly, Arabs are exposed to a new food environment when they  
20  
21 163 migrate to Canada where sweetened products are abundant, cheap, convenient,  
22  
23 164 accessible, and part of the mainstream food culture. Such an experience creates a variety  
24  
25 165 of social and economic challenges for maintaining ethnic cuisine as a marker of  
26  
27 166 community affiliation and may be a potential source of stress and anxiety [21].  
28

29 167  
30 168 Understanding why individuals consume sweetened products is a complex issue,  
31  
32 169 especially given the psychological properties of these products and their effects in the  
33  
34 170 brain. A review of the literature suggests that two sets of inter-related psychosocial  
35  
36 171 factors are associated with the consumption of sweetened products; sleep-related  
37  
38 172 problems and mood/stress-related problems. However, the nature of the relationships  
39  
40 173 between these factors is not well understood [22].  
41

42 174  
43 175 Excessive daytime sleepiness is characterized by persistent sleepiness and lack of energy,  
44  
45 176 most often caused by sleep deprivation, obstructive sleep apnea and/or use of medication  
46  
47 177 [23]. It is present in all individuals, regardless of age, and recognized as the first  
48  
49 178 symptom that defines narcolepsy [24]. Both excessive daytime sleepiness [25, 26] and  
50  
51 179 narcolepsy [24] have been associated with the development and/or exacerbation of  
52  
53 180 obesity. One potential mechanism explaining this association is through effects on  
54  
55 181 appetite and intake of food[22]. Indeed, excessive daytime sleepiness has been associated  
56  
57 182 with the consumption of food high in fats, as well as refined carbohydrates[22]. A recent  
58  
59 183 study found that excessive daytime sleepiness was associated with the consumption of  
60  
184 refined carbohydrate-rich snacks amongst Japanese children[27]. A very-low

1  
2  
3 185 carbohydrate, high-protein diet has shown improvement in daytime alertness in adults  
4  
5 186 patients with narcolepsy[28]. In another study, subjects fed a carbohydrate liquid diet  
6  
7 187 scored higher for subjective fatigue than those fed with a high-fat or a high-protein diet  
8  
9 188 [29]. Hormonal, metabolic, and inflammatory mechanisms could explain why a diet high  
10  
11 189 in fats and/or sugars could induce somnogenic effects in the body [22].  
12  
13 190

14 191 There is evidence that the association between daytime sleepiness and sweetened  
15  
16 192 products may be explained by the mediating effects of mood/stress problems, such as  
17  
18 193 psychological distress. This mediating effect is supported in the literature for some of  
19  
20 194 Baron and Kenny's criteria to establish mediation[30]. First, there is supporting evidence  
21  
22 195 that daytime sleepiness is associated with consumption of processed food high in dietary  
23  
24 196 sugars [27,28]. Second, daytime sleepiness is correlated with depression and  
25  
26 197 psychological distress in both Western and Arab populations [31-34]. Third, a preference  
27  
28 198 for chocolate and other sweetened products is well documented in depressed and  
29  
30 199 psychological distressed individuals[35, 36]. This preference could be explained by the  
31  
32 200 effects of sweets on relieving mood or stress [13-15]. If sleepy individuals also tend to  
33  
34 201 feel distressed, and psychological distress induces the consumption of sweetened  
35  
36 202 products, then the relationship between daytime sleepiness and the consumption of these  
37  
38 203 products could be, at least, partially mediated by psychological distress.  
39  
40 204

41 205 Daytime sleepiness and psychological distress, and their relationship to the consumption  
42  
43 206 of sweetened products have never been studied in Arab Canadians. Addressing this gap  
44  
45 207 could shed light on the prevention/management of obesity in the Canadian Arab  
46  
47 208 community. The burden of obesity in this community has important human and economic  
48  
49 209 consequences for the Canadian public health system because Arabs are one of the fastest  
50  
51 210 growing migrant groups in Canada, constituting more than 4% of the urban population of  
52  
53 211 Montreal and Ottawa[2]. Understanding the relationship between daytime sleepiness,  
54  
55 212 psychological distress and diet could provide useful information to improve daytime  
56  
57 213 alertness, psychological well-being and diet quality, all of which are known risk factors  
58  
59 214 to obesity and chronic diseases. From this perspective, this paper has two objectives: 1) to  
60  
215 assess the prevalence of excessive daytime sleepiness and psychological distress in an

1  
2  
3 216 Arab community living in Montreal[2], and 2) to test whether the relationship between  
4  
5 217 daytime sleepiness and consumption of sweetened products is mediated by psychological  
6  
7 218 distress using Baron and Kenny's [30] criteria and the Sobel test.  
8  
9 219

10 220 **Methods:**

11 221 *Participants*

12 222 The Middle Eastern or Arab community living in Canada is heterogeneous in terms of its  
13  
14 223 country of birth and religious affiliation. The main groups are Lebanese (41%), Egyptian  
15  
16 224 (12%), Syrian (6%), Moroccan (6%), and Iraqi (6%)[2]. Canadians of Arab origin are  
17  
18 225 equally divided between Muslims and Christians, of which the majority is Catholic[2].  
19  
20 226 The sociocultural heterogeneity within the Middle Eastern community is essential to  
21  
22 227 acknowledge, especially because religious beliefs impose dietary restrictions and may  
23  
24 228 influence psychosocial factors related to health in Arab Muslims [21, 37].  
25  
26 229

27  
28 230 The target population of this study is an established Catholic Middle Eastern community  
29  
30 231 living in Montreal, Canada. This population is composed of first and second generation  
31  
32 232 migrants, mostly from Egypt, Lebanon and Syria. Recruitment and data collection  
33  
34 233 occurred at three Catholic Middle Eastern churches located in Montreal. Participation  
35  
36 234 was solicited through public announcements and was limited to one respondent per  
37  
38 235 household to avoid bias related to family customs. Subjects were all volunteers and could  
39  
40 236 withdraw from the study at any point.  
41

42 237

43 238 The research protocol was submitted and approved by the ethics committee of the Centre  
44  
45 239 Hospitalier de l'Université de Montréal (SL 06-063). All participants provided informed  
46  
47 240 written consent.  
48

49 241

50 242 *Instruments*

51 243 Socio-demographic characteristics were collected using a self-reported questionnaire  
52  
53 244 adapted from Health Canada[38]. Physical activity was assessed by asking the question  
54  
55 245 "how many times per week do you exercise enough to sweat? " Five response categories  
56  
57 246 were provided ranging from 0 to 4 or more times per week. Participants also self-reported  
58  
59  
60

1  
2  
3 247 height and weight. BMI was calculated as weight (kg)/ height (m)<sup>2</sup> and categorized as  
4 248 normal weight (BMI < 25); overweight 25 ≤ BMI < 30; and obese (BMI > 30) [39].  
5  
6

7 249  
8  
9 250 Food consumption was assessed using a food frequency questionnaire (FFQ) previously  
10 251 developed and pretested with the study community to measure consumption of 26  
11 252 different sweet food and drink products [7]. This questionnaire is easy to read and to  
12 253 understand, and culturally relevant to the study community. To answer the FFQ,  
13 254 respondents reported the average number of days per week, in a typical week, in which  
14 255 each listed product was eaten or drank (i.e., excluding festivities). Participants were also  
15 256 asked to report how many portions of the food item they typically ate. Examples of  
16 257 portions sizes were taken from the Canadian Nutrient File (CNF) and provided to  
17 258 participants[40]. For the purpose of this study, we selected food items representing  
18 259 sweetened products, which include cookies, chocolate, cakes and candies.  
19  
20  
21  
22  
23  
24  
25  
26  
27

28 261 Daytime sleepiness was measured using the self-report *Epworth Sleepiness Scale* (ESS)  
29 262 [41]. Respondents used a four-point scale (0 to 3) to express their perceived likelihood of  
30 263 falling asleep during the day in eight different situations (sitting and reading, watching  
31 264 television, sitting inactive in a public place, as a passenger in a car for an hour without a  
32 265 break, lying down to rest in the afternoon when circumstances permit, sitting and talking  
33 266 to someone, and sitting quietly after a lunch without alcohol). The ESS instrument has a  
34 267 high internal consistency (Cronbach's alpha = 0.88) and a high test-retest reliability after  
35 268 5 months (r = 0.82)[42]. For descriptive purposes, daytime sleepiness scores on the ESS  
36 269 were coded into three levels of increasing daytime sleepiness: low (ESS scores 0-5),  
37 270 intermediate (ESS scores 6-11) and high (ESS scores 12-24). Intermediate (6-11) and  
38 271 high (12-24) ESS scores were shown to have a 30% and 69% increased risk for sleep  
39 272 onset during the Multiple Sleep Latency Test (MSLT), an objective measure of daytime  
40 273 sleep tendency [43].  
41  
42  
43  
44  
45  
46  
47  
48  
49  
50

51 274  
52  
53 275 Psychological distress was measured using the *Kessler Psychological Distress Scale*  
54 276 (K10) [44]. This instrument is composed of 10 questions on anxiety and depressive  
55 277 symptomology. Respondents self-reported the degree to which they had these feelings for  
56  
57  
58  
59  
60

1  
2  
3 278 the month prior to completing the instrument using a five-point Likert scale (all the time,  
4  
5 279 often, sometimes, rarely, never). Scores, ranging from 10 to 50, represent an increasing  
6  
7 280 gradient of psychological distress. The K10 instrument has a high internal consistency  
8  
9 281 (Cronbach's alpha = 0,92) [44]. For descriptive purposes, psychological distress scores  
10  
11 282 on the K10 were grouped into standard groups as low (10-20), moderate (21-29) and high  
12  
13 283 levels of psychological distress (30-50) [44].  
14

284

285 *Analysis*

17 286 Data were analyzed using SPSS (Version 18.0). As a first step, we present descriptive  
18  
19 287 data on the consumption of sweetened products according to sex, age, body mass index  
20  
21 288 (BMI), physical activity, daytime sleepiness, and psychological distress. Consumption of  
22  
23 289 sweetened products corresponded to the daily amount of total sugars eaten from cakes,  
24  
25 290 cookies, chocolate, and candies. This was calculated using data on the frequency and  
26  
27 291 portions consumed from these products obtained from the FFQ, and the estimated amount  
28  
29 292 of total sugars contained in mean portions of these products using CNF.  
30

293

31 294 As a second step, univariate regression analysis was performed to estimate the  
32  
33 295 associations between consumption of sweetened products and age, sex, physical activity,  
34  
35 296 BMI, daytime sleepiness and psychological distress. Similar tests were performed to  
36  
37 297 verify if the consumption of sweetened products varied by other socio-demographics  
38  
39 298 (country of birth, time since migration, family income, education level, civil status and  
40  
41 299 employment status). For all regression analyses, consumption of sweetened products was  
42  
43 300 log-transformed. Physical activity was used as a ordinal measure using the five answer  
44  
45 301 choices (0-4 times or more per week). All other variables were used as continuous  
46  
47 302 measures.  
48

303

49 304 Next, we applied the Baron and Kenny [30,45] criteria to assess whether the relationship  
50  
51 305 between daytime sleepiness (independent variable) and consumption of sweetened  
52  
53 306 products (dependent variable) was mediated by psychological distress (mediator).  
54  
55 307 According to Baron and Kenny four statistical conditions need to be met in order to  
56  
57 308 establish complete mediation and three conditions to establish partial mediation [30, 45].  
58  
59  
60

1  
2  
3 309 First, univariate regression was used to test if daytime sleepiness was significantly  
4 associated with consumption of sweetened products. Second, we assessed whether  
5 310  
6 daytime sleepiness and psychological distress were significantly associated. Third, we  
7 311  
8 tested whether psychological distress (mediator) was associated with the consumption of  
9 312  
10 sweetened products when both daytime sleepiness and psychological distress were  
11 313  
12 entered as predictors in a multivariate regression analysis. Fourth, to establish that  
13 314  
14 psychological distress completely mediates the relationship between daytime sleepiness  
15 315  
16 and consumption of sweetened products, we examined whether the effect of daytime  
17 316  
18 sleepiness on consumption of sweetened products controlling for psychological distress  
19 317  
20 was zero. If the first three steps are met but the Step 4 is not, then partial mediation is  
21 318  
22 indicated [45]. The Sobel test was used to statistically evaluate whether the indirect effect  
23 319  
24 of the independent variable on the dependent variable through the mediator variable was  
25 320  
26 significant[46].  
27 321

28 322  
29 323 As a final step, we ran alternative mediation models to rule out plausible competing  
30 324 interpretations of the data and to verify whether our hypothesized model best fit the data.  
31 325 First, daytime sleepiness was entered as the mediator of the relationship between  
32 326 psychological distress (independent) and consumption of sweetened products  
33 327 (dependent). In a second alternative model, consumption of sweetened products was  
34 328 entered as the mediator of the relationship between daytime sleepiness (independent  
35 329 variable) and psychological distress (dependent variable).  
36 330

### 331 **Results**

332 Participants were aged between 18 and 60 years (Mean = 34.6; Standard deviation (SD) =  
333 12.5). There were slightly more women (*n* 101) than men (*n* 85). Country of birth  
334 included Egypt (31.9 %), Lebanon (25.1 %), Syria (14.7 %), and other Middle Eastern  
335 countries (5.3 %). Individuals migrated between 1962 and 2007, of which 86% arrived  
336 before 2000, meaning they have spent more than 10 years in Canada. An additional  
337 23.0% of subjects were born in Canada; these were second-generation migrants (i.e.,  
338 children of immigrating parents born in the Middle Eastern). Participant's civil status was  
339 as follows; married or engaged (47.3%), single (46.2%), separated/divorced (4.3%), and



1  
2  
3 340 widowed (2.2%). The vast majority of respondents had at least a college diploma  
4 (88.0%), and most had a university degree (65.8%). Most participants had a family  
5 341 income above CAD \$50,000 (66.9%).  
6  
7 342  
8  
9 343

10 344 Average consumption of sweetened products was of 15.5 g/day (SD=13.9; *n* 186) with  
11 the range from 0 to 93.1 g/day. The share of each food item to the amount of total sugars  
12 345 from these products was as follows; cakes (51.3%), chocolate (24.7%), cookies (16.1%)  
13 346 and candies (7.9 %).  
14  
15  
16 347  
17  
18 348

19 349 The average daytime sleepiness score on ESS was 8.2 (SD= 4.5) (*n* 186). A third of  
20 350 individuals (30.1%) had a low daytime sleepiness score (0-5) and half (50.5%) had an  
21 intermediate daytime sleepiness score (6-11). One-fifth of individuals (19.5%) had a high  
22 351 daytime sleepiness score (12-24). Almost one-third of individuals met the clinical criteria  
23 352 for excessive daytime sleepiness (EDS) (defined as ESS scores above 10). Daytime  
24 353 sleepiness did not vary by sex, age or BMI.  
25  
26 354  
27  
28  
29  
30  
31 355

32 356 The average psychological distress score on the K10 was 20.8 (SD= 6.2) (*n* 186).  
33 357 More than one half the respondents (55.4%) had a low distress score of 0-20; one-third  
34 358 (32.8%) had a moderate distress score of 21-30; and one-tenth had a high distress score of  
35 359 30-50 (11.8%). Psychological distress did not vary by sex, age or BMI.  
36  
37  
38  
39 360

40  
41 361 Table 1 presents descriptive data on the consumption of sweetened products according to  
42 age, sex, physical activity, BMI, daytime sleepiness, and psychological distress. Females  
43 362 consumed slightly more sweetened products than males (1.7g/day), while patterns for age  
44 363 and BMI were less defined. Importantly, the consumption of sweetened products varied  
45 364 according to psychological distress and daytime sleepiness score levels. Individuals with  
46 365 high distress ate an additional 5.6g of total sugars/day, 45% more than individuals with  
47 366 moderate distress, and an additional 8.5g of total sugars/day, 68% more than individuals  
48 367 with low distress. Individuals with high daytime sleepiness (>12) ate an additional 2.9g  
49 368 of total sugars/day, 23% more than subjects with moderate daytime sleepiness, and an  
50 369 additional 6.9g of total sugars/day, 54% more than individuals with low daytime  
51  
52  
53  
54  
55 370  
56  
57  
58  
59  
60

1  
2  
3 371 sleepiness. Other socio-demographics were not related statistically to the consumption of  
4  
5 372 sweetened products.  
6

7 373

8  
9 374 Table 1 also presents the results of univariate regression analyses between consumption  
10  
11 375 of sweetened products (log-transformed) and age, sex, BMI, daytime sleepiness, and  
12  
13 376 psychological distress. Consumption of sweetened products did not vary significantly by  
14  
15 377 age, sex or BMI. The consumption of sweetened products was positively associated with  
16  
17 378 psychological distress ( $p<0.00$ ), as well with daytime sleepiness ( $p<0.04$ ).  
18

19 379

20 380 Multivariate analysis (Table 2) consisted of simultaneous modeling daytime sleepiness  
21  
22 381 and psychological distress. In this model, the association between psychological distress  
23  
24 382 and consumption of sweetened products remained statistically significant ( $p<0.01$ ),  
25  
26 383 whereas the relationship with daytime sleepiness was no longer significant ( $p<0.09$ ).  
27

28 384

29 385 We were able to verify the first three steps of Baron and Kenny[30] to establish  
30  
31 386 mediation. First, daytime sleepiness was significantly associated with the consumption of  
32  
33 387 sweetened products ( $p<0.04$ ). Second, daytime sleepiness and psychological distress were  
34  
35 388 significantly correlated ( $r=0.15$ ;  $p<0.04$ ). Third, psychological distress was associated  
36  
37 389 with the consumption of sweetened products ( $p<0.01$ ) when both psychological distress  
38  
39 390 and daytime sleepiness were entered as predictors in the multivariate regression model.  
40  
41 391 However, the fourth step was not met. In our analysis, the effect of daytime sleepiness on  
42  
43 392 consumption of sweetened products controlling for psychological distress was reduced  
44  
45 393 but it was not zero. Finally, the Sobel test showed that the indirect effect of the  
46  
47 394 independent variable on the dependent variable through the mediator variable was  
48  
49 395 significant (Sobel statistic=2.14; SE=0.01;  $p<0.03$ ).  
50

51 396

52 397 In order to strengthen the robustness of the results, two alternative mediation models  
53  
54 398 were tested. In the first alternative model, Baron and Kenny's third criteria was not  
55  
56 399 satisfied. Indeed, daytime sleepiness (mediator) was not associated ( $p<0.15$ ) with  
57  
58 400 psychological distress (dependent) when both daytime sleepiness and consumption of  
59  
60 401 sweetened products (independent) were entered as predictors in a multivariate regression

1  
2  
3 402 analysis. In the second alternative model, all first three Baron and Kenny's criteria were  
4 403 satisfied. However, comparing both models using Akaike information criterion (AIC)  
5 404 indicated that the hypothesized mediation model (AIC=848) is a far better fit than this  
6 405 second alternative model (AIC=1205). Furthermore, the Sobel test for the second  
7 406 alternative mediation model showed that the indirect effect of the independent variable on  
8 407 the dependent variable through the mediator variable was not significant (Sobel  
9 408 statistic=1.63 SE=0.12;  $p < 0.1$ ).

10  
11  
12  
13  
14  
15  
16 409  
17 410 Lastly, the robustness of our analyses could be biased by the moderate association that  
18 411 exists between daytime sleepiness and the K10 instrument first item (K1) that assesses  
19 412 fatigue/tiredness ( $r = 0.18$ ;  $p < 0.02$ ). To verify this, we repeated our analyses by using a  
20 413 total score of K9 (i.e., K10 after excluding item #1). This did not change the nature of our  
21 414 results because 1) daytime sleepiness and K9 were still significantly correlated ( $r = 0.14$ ;  
22 415  $p < 0.04$ ); 2) K9 was associated with the consumption of sweetened products ( $\beta = 0.17$ ;  
23 416  $p < 0.02$ ) when both K9 and daytime sleepiness were entered as predictors in the  
24 417 multivariate regression model, and 3) the effect of daytime sleepiness on consumption of  
25 418 sweetened products controlling for psychological distress was reduced but it was not  
26 419 zero.

## 420 421 **Discussion**

422 The data presented in this paper show that the level of daytime sleepiness in the Catholic  
423 Middle Eastern Canadian community is statistically associated with higher consumption  
424 of sweetened products, such as chocolate, candies, cakes and cookies. Most importantly,  
425 we found that the first three criteria defined by Baron and Kenny to establish mediation  
426 were met, but that the fourth criteria was not. The results suggest that the relationship  
427 between daytime sleepiness and consumption of sweetened products is partially mediated  
428 by the level of psychological distress.

429  
50  
51  
52  
53 430 The strengths of this study are the use of well-established procedures to assess mediation  
54 431 - Baron and Kenny's (1986) four-step approach and the Sobel test, and the examination  
55 432 of alternative mediating models. Our analysis, however, was based on assumptions of  
56  
57  
58  
59  
60

1  
2  
3 433 having a correctly specified mediation model, including no misspecifications of causal  
4 434 order and of causal direction, or of imperfect measurements and unmeasured variables  
5 435 [47]. In reality, such assumptions are difficult or even impossible to achieve. By testing  
6 436 alternative mediate models we showed that the one we described is the best fitted to  
7 437 account for the relationship between these three variables. Furthermore, data from prior  
8 438 research support the proposition that a mediation relation exists between these variables.  
9 439

10 440 The relationship observed between daytime sleepiness and consumption of food high in  
11 441 dietary sugars is consistent with previous studies conducted in western and non-western  
12 442 settings [27-29]. Similarly, previous work provides strong support that the consumption  
13 443 of sweetened products is triggered by negative emotional or distress feelings in western  
14 444 populations. Negative mood (as measured by anxiety, fatigue and depression scales) has  
15 445 been correlated with craving intensity for sweet food [36]. Experimental studies have also  
16 446 demonstrated an association between stress or negative mood and the consumption of  
17 447 savory foods in emotional eaters [35, 48]. Thus one explanation in support of our  
18 448 mediating model is that individuals who experience daytime sleepiness may consume  
19 449 energy dense sugary rich foods to upgrade their energy level or to alleviate their negative  
20 450 mood or psychological distress. This explanation fits with the fueling and emotional  
21 451 functions attributed to sweetened food and drink products by members of the studied  
22 452 community in semi-structured interviews [49]. Furthermore, this explanation has  
23 453 biological plausibility since sweet taste may alleviate dysphoric mood or stress through  
24 454 dopaminergic and opioidergic neurotransmission in the brain [13-15].  
25 455

26 456 It would be interesting to explore which of anxiety or depression correlate stronger with  
27 457 daytime sleepiness since the K10 instrument contains items that assesses both symptoms.  
28 458 However, this instrument is used as a single scale because anxiety and depression items  
29 459 are highly correlated. There is nevertheless evidence that both anxiety and depression are  
30 460 highly correlated with excessive daytime sleepiness and fatigue [34].  
31 461

32  
33  
34  
35  
36  
37  
38  
39  
40  
41  
42  
43  
44  
45  
46  
47  
48  
49  
50  
51  
52  
53  
54  
55  
56  
57  
58  
59  
60

1  
2  
3 462 Our study highlights that sleep, mood and diet are interconnected, and that efforts to  
4  
5 463 improve diet quality must consider the psychosocial well-being of individuals, especially  
6  
7 464 given the known properties of sweets to temporarily alleviate fatigue, stress and anxiety.  
8  
9 465 These results have important public health implications for the prevention of obesity and  
10  
11 466 chronic diseases, which are growing concerns in the Arab Canadian community[3].  
12  
13 467 Indeed, consumption of processed products high in dietary sugars is recognized as an  
14  
15 468 important contributor to the development of these diseases[6]. As reported elsewhere, the  
16  
17 469 consumption level of total sugars (all foods considered), ~ 20% of diet, in this community  
18  
19 470 is now similar that of the Canadian and Quebec population[7]. The average daytime  
20  
21 471 sleepiness score (8.2) and the prevalence of EDS (28%) measured in this paper are within  
22  
23 472 the range noted in western countries[50]. The obesity prevalence of 15.6% is also similar  
24  
25 473 to the Canadian average and the general Arab community, when self-reported measures  
26  
27 474 are taken[3].  
28  
29 475

30 476 The prevalence of high psychological distress (K10>30) at 11.8% is nearly half that of  
31  
32 477 the Canadian average, reported to be 20.7% [51]. It is possible that sociocultural factors  
33  
34 478 such as family social support or having a religious faith protect against anxiety and  
35  
36 479 depression. Religious affiliation, for example, is higher in the Middle Eastern community  
37  
38 480 (94%) than in the overall population (83%)[2]. Also, the strength and size of social  
39  
40 481 network shown to have tempering effect on weight gain and the general health of  
41  
42 482 individuals living in large Canadian ethnic groups [5]. The sources of psychological  
43  
44 483 distress in the Middle Eastern Canadian community are, however, unknown and warrant  
45  
46 484 future research. Socioeconomic difficulties do not seem to play an essential role in our  
47  
48 485 population sample, since employment rate, education level and household income were  
49  
50 486 found to be relatively high. The difficulties of maintaining traditional dietary practices in  
51  
52 487 the host country may be potential sources of social and economic stress [21].  
53  
54 488

55 489 In our analysis, BMI had a positive, but not significant association with daytime  
56  
57 490 sleepiness. In a previous paper, we observed an inverse (but not significant) relationship  
58  
59 491 between consumption of sweetened products and BMI in the same community [7]. These  
60  
492 results, however, must be interpreted by taking into account that overweight and obese

1  
2  
3 493 subjects may have under-reported their weight or under-reported their consumption of  
4  
5 494 sweetened products, but also the cross-sectional design.  
6  
7 495

8  
9 496 This study has limitations. First, the sample size was small and thus statistical power was  
10  
11 497 limited. However, the composition of our sample reflects the characteristics of the  
12  
13 498 general Catholic Middle Eastern Canadian community in terms of birthplace, religious  
14  
15 499 affiliation, education and income[2]. Our findings, however, cannot be generalized to the  
16  
17 500 Muslim Arab Canadian community. Second, the study is based on self-reported  
18  
19 501 measures. However, both instruments we used (ESS and K10) are valid and reliable  
20  
21 502 instruments widely used in both sleep and mood-related studies. Third, we did not  
22  
23 503 account for other sleep problem measures, including duration of sleep and sleep  
24  
25 504 deprivation, as well as other potential confounding disorders. Sleep duration and  
26  
27 505 obstructive sleep apnea are the most common causes of daytime sleepiness[22], but  
28  
29 506 studies examining the relationships between sleep duration, dietary intake and obesity has  
30  
31 507 produced mixed results[52]. Fourth, findings are based on cross-sectional data. Therefore,  
32  
33 508 it is impossible to know the causal order of the observed associations, and the existence  
34  
35 509 of bi-directional effects, for example, between the consumption of foods high in dietary  
36  
37 510 sugars and daytime sleepiness.  
38

39 511

## 39 512 **Conclusion**

40  
41 513 This study expands the limited evidence base concerning the association between  
42  
43 514 consumption of sweetened products, daytime sleepiness and psychological distress in any  
44  
45 515 communities including migrants ones. One novel contribution of this study is its  
46  
47 516 inclusion of a measure of psychological distress and the use of Baron and Kenny's [30,  
48  
49 517 44] four-step approach and the Sobel test to establish that the consumption of sweetened  
50  
51 518 products and daytime sleepiness is partially mediated by psychological distress. One  
52  
53 519 possible explanation in support of this relationship is that individuals experiencing  
54  
55 520 daytime sleepiness may reach for energy dense sugary rich foods in order to upgrade their  
56  
57 521 energy level or to alleviate their psychological distress. Further work is needed to test this  
58  
59 522 mediation relationship in larger samples and to verify the potential effects of sleep  
60  
61 523 duration and quality of sleep in this relationship.

**Table 1** Consumption of sweetened products (total sugars/day) according to age, sex, BMI, physical activity, BMI, psychosocial distress and daytime sleepiness scores (*n* 186).

| Factors                             | Subjects |      | Sweetened products (g/day) |     | P <* |
|-------------------------------------|----------|------|----------------------------|-----|------|
|                                     | <i>n</i> | %    | Mean                       | SE  |      |
| Sex                                 |          |      |                            |     | 0.66 |
| Male                                | 85       | 45.7 | 14.6                       | 1.5 |      |
| Female                              | 101      | 54.3 | 16.3                       | 1.4 |      |
| Age                                 |          |      |                            |     | 0.59 |
| 18-30                               | 83       | 44.6 | 19.5                       | 1.6 |      |
| 31-40                               | 50       | 26.9 | 12.7                       | 1.7 |      |
| 41-50                               | 21       | 11.3 | 17.2                       | 4.2 |      |
| 51-60                               | 32       | 17.2 | 12.4                       | 1.8 |      |
| Physical activity                   |          |      |                            |     | 0.31 |
| No activity                         | 57       | 30.6 | 16.6                       | 1.8 |      |
| 1 time per week                     | 50       | 26.9 | 17.3                       | 2.1 |      |
| 2 times per week                    | 31       | 16.7 | 13.4                       | 2.2 |      |
| 3 times per week                    | 30       | 16.1 | 11.4                       | 1.6 |      |
| ≥ 4 times per week                  | 18       | 9.7  | 17.3                       | 5.0 |      |
| Body mass index                     |          |      |                            |     | 0.86 |
| Normal (18.5-24.9)                  | 88       | 44.6 | 16.5                       | 1.5 |      |
| Overweight (25-29.9)                | 69       | 37.1 | 13.6                       | 1.4 |      |
| Obese(>30)                          | 29       | 15.6 | 17.1                       | 3.3 |      |
| Psychological distress (K10 scores) |          |      |                            |     | 0.00 |
| Low (10-20)                         | 103      | 55.4 | 12.7                       | 1.1 |      |
| Moderate (21-30)                    | 61       | 32.8 | 18.3                       | 1.8 |      |
| High (30-50)                        | 22       | 11.8 | 21.2                       | 4.3 |      |
| Daytime sleepiness (ESS scores)     |          |      |                            |     | 0.04 |
| Low (0-5)                           | 56       | 30.1 | 12.7                       | 1.5 |      |
| Moderate (6-11)                     | 94       | 50.5 | 15.6                       | 1.5 |      |
| High (12-24)                        | 36       | 19.4 | 19.6                       | 2.3 |      |

\*In the univariate regression analysis, sweetened products was log-transformed and all variables were entered as continuous (age, BMI, psychological distress scores (10-50) and daytime sleepiness scores (0-24). Physical activity categories were created by asking "how many times per week do you exercising enough to sweat?" and answers ranged from 0-4 or more times per week.

540 **Table 2** Relationships between consumption of sweetened products, daytime sleepiness and  
 541 psychological distress in the multivariate model (*n* 186)

|                        | $\beta$ | SE   | S $\beta$ | T value | P<   |
|------------------------|---------|------|-----------|---------|------|
| Model <sup>1</sup>     |         |      |           |         |      |
| Daytime sleepiness     | 0.05    | 0.02 | 0.16      | 2.15    | 0.04 |
| Model <sup>2</sup>     |         |      |           |         |      |
| Constant               | 2.75    | 0.54 |           | 5.10    | 0.00 |
| Daytime sleepiness     | 0.03    | 0.02 | 0.12      | 1.69    | 0.09 |
| Psychological distress | 0.05    | 0.02 | 0.19      | 2.61    | 0.01 |

543  $\beta$  = Beta coefficient; S $\beta$  = standardized Beta coefficient; SE= standard error

544 Consumption of sweetened products was log-transformed. Psychological distress scores (10-50) and  
 545 daytime sleepiness scores (0-24) are entered as continuous and are normally distributed.

546 <sup>1</sup> Model summary: R=0.15, F=4.26, p<0.04; <sup>2</sup> Model summary: R=0.27, F=2.37, p<0.03, adjusted for  
 547 psychological distress (mediator) and age.

### 548 549 550 551 552 553 554 **Contributorship**

555  
556 The study was developed and designed by all authors, and supervised by MD. Data  
 557 preparation and analysis was undertaken by JCM, MC, and OR. The initial draft of the  
 558 paper was prepared by JCM, following extensive discussions with MC, OR MD.  
 559 Successive drafts were developed by JCM, with inputs from the other co-authors. All  
 560 authors have reviewed and approved the final version.  
 561  
562  
563  
564  
565  
566  
567  
568  
569  
570  
571  
572  
573  
574  
575  
576



1  
2  
3 577

4 578

5 579

6 580

7 581

8 582

9 583

10 584

**References**

11 585

12 586

13 587

14 588

15 589

16 590

17 591

18 592

19 593

20 594

21 595

22 596

23 597

24 598

25 599

26 600

27 601

28 602

29 603

30 604

31 605

32 606

33 607

34 608

35 609

36 610

37 611

38 612

39 613

40 614

41 615

42 616

43 617

44 618

45 619

46 620

47 621

1. Tremblay MS, Perez CE, Ardern CI, et al. Obesity, overweight and ethnicity. *Health Rep* 2005; **16**:23-34
2. Health Canada. *The Arab community*. 2007 Ottawa: Canada.
3. Liu R, So L, Mohan S, et al. Cardiovascular risk factors in ethnic populations within Canada: results from national cross-sectional surveys 2010; *Open medicine*:e143-53
4. Nakanishi S, Okubo M, Yoneda M, et al. A comparison between Japanese-Americans living in Hawaii and Los Angeles and native Japanese: the impact of lifestyle westernization on diabetes mellitus. *Biomedicine & pharmacotherapy* 2004;**58**:571-7
5. McDonald JT, Kennedy S. Is migration to Canada associated with unhealthy weight gain? Overweight and obesity among Canada's immigrants. *Social science & medicine* 2005;**61**:2469-81
6. World Health Organization Diet. Nutrition and the Prevention of Chronic Diseases. Report of the joint WHO/FAO expert consultation. WHO Technical Report Series no. 916. 2003 Geneva: WHO.
7. Moubarac J-C, Receveur O, Cargo M, et al. Consumption patterns of sweetened food and drink products in a Catholic Middle Eastern Canadian Community. *Public Health Nutrition*; 2012 doi:10.1017/S1368980012005460
8. Moubarac J-C, Martins AP, Claro RM, et al. Evidence from Canada. *Public Health Nutrition*. 2012. Available on CJO doi:10.1017/S1368980012005009
9. Chapelot D. The role of snacking in energy balance: a biobehavioral approach. *The Journal of nutrition* 2011;**141**:158-62
10. Lustig RH, Schmidt LA, Brindis CD. Public health: The toxic truth about sugar. *Nature* 2012;**482**:27-9
11. Drewnowski A. The real contribution of added sugars and fats to obesity. *Epidemiologic reviews* 2007;**29**:160-71
12. Levine AS, Kotz CM, Gosnell BA. Sugars: hedonic aspects, neuroregulation, and energy balance. *The American journal of clinical nutrition* 2003;**78**:834S-42S
13. Gibson, EL. Emotional influences on food choice: sensory, physiological and psychological pathways. *Physiology & Behavior* 2006;**89**:53-61
14. Adam TC, Epel ES. Stress, eating and the reward system. *Physiology & Behavior* 2007;**91**:449-58
15. Macht M. How emotions affect eating: A five-way model. *Appetite* 2008;**50**:1-11
16. Hassan-Wassef H. Food habits of the Egyptians: newly emerging trends. *Eastern Mediterranean health journal* 2004;**10**:898-915

- 1  
2  
3 622 17. Issa C, Salameh P, Batal M, et al. The nutrient profile of traditional Lebanese  
4 623 composite dishes: comparison with composite dishes consumed in France.  
5 624 International journal of food sciences and nutrition 2004;60 Suppl 4:285-95  
6 625 18. Parker S, Kamel N, Zellner D Food craving patterns in Egypt: comparisons with  
7 626 North America and Spain. *Appetite* 2003;40:193-5  
8 627 19. Nasreddine L, Hwalla N, Sibai A, et al. Food consumption patterns in an adult  
9 628 urban population in Beirut, Lebanon. *Public health nutrition* 2006; 9:194-203  
10 629 20. Musaiger AO, Al-Hazzaa, HM. Prevalence and risk factors associated with  
11 630 nutrition-related noncommunicable diseases in the Eastern Mediterranean region.  
12 631 International journal of general medicine 2012;5:199-217  
13 632 21. Vallianatos H, & Raine, K. Consuming Food and Constructing Identities among  
14 633 Arabic and South Asian Immigrant Women. *Food, Culture and Society* 2008;  
15 634 11:355-60  
16 635 22. Panossian LA, Veasey, SC. Daytime sleepiness in obesity: mechanisms beyond  
17 636 obstructive sleep apnea--a review. *Sleep* 2012;35:605-15  
18 637 23. Pagel JF. Excessive daytime sleepiness. *Am Fam Physician* 2009;79:391-6  
19 638 24. Peterson, PC, Husain, AM. Pediatric narcolepsy. *Brain & development*  
20 639 2008;30:609-23  
21 640 25. Newman AB, Spiekerman CF, Enright P, et al. Daytime sleepiness predicts  
22 641 mortality and cardiovascular disease in older adults. The Cardiovascular Health  
23 642 Study Research Group. *J Am Geriatr Soc* 2000;48:115-23  
24 643 26. Vgontzas AN, Bixler EO, Chrousos GP. Sleep apnea is a manifestation of the  
25 644 metabolic syndrome. *Sleep Med Rev* 2005;9:211-24  
26 645 27. Gaina A, Sekine M, Hamanishi S, et al. Daytime sleepiness and associated factors  
27 646 in Japanese school children. *The Journal of pediatrics* 2007;151:518-22, 22 e1-4  
28 647 28. Husain AM, Yancy WS, Jr., Carwile ST, et al. Diet therapy for narcolepsy.  
29 648 *Neurology* 2004;62:2300-2  
30 649 29. Cunliffe A, Obeid OA, Powell-Tuck J. Post-prandial changes in measures of  
31 650 fatigue: effect of a mixed or a pure carbohydrate or pure fat meal. *Eur J Clin Nutr*  
32 651 1997;51:831-8  
33 652 30. Baron R, Kenny D. The moderator-mediator variable distinction in social  
34 653 psychological research: conceptual, strategic, and statistical considerations. *J Pers*  
35 654 *Soc Psychol* 1986;51:1173-82  
36 655 31. Bixler EO, Vgontzas AN, Lin HM, et al. Excessive daytime sleepiness in a  
37 656 general population sample: the role of sleep apnea, age, obesity, diabetes, and  
38 657 depression. *J Clin Endocrinol Metab* 2005;90:4510-5  
39 658 32. Chellappa SL, Araujo JF. Excessive daytime sleepiness in patients with  
40 659 depressive disorder. *Rev Bras Psiquiatr* 2006;28:126-9  
41 660 33. Mume CO Excessive daytime sleepiness among depressed patients. *Libyan J Med*  
42 661 2010; 5:doi 10.4176/091024.  
43 662 34. Theorell-Haglow J, Lindberg E, Janson C. What are the important risk factors for  
44 663 daytime sleepiness and fatigue in women? *Sleep* 2006;29:751-7  
45 664 35. Macht M, Mueller J. Interactive effects of emotional and restrained eating on  
46 665 responses to chocolate and affect. *The Journal of nervous and mental disease*  
47 666 2007;195:1024-6  
48  
49  
50  
51  
52  
53  
54  
55  
56  
57  
58  
59  
60

- 1  
2  
3 667 36. Christensen L, Pettijohn L. Mood and carbohydrate cravings. *Appetite*  
4 668 2001;**36**:137-45  
5 669 37. Sabate J. Religion, diet and research. *The British journal of nutrition* 2004;**92**:199-  
6 670 201  
7  
8 671 38. Statistics Canada Enquête sur la santé dans les collectivités canadiennes (ESCC).  
9 672 Questionnaire pour Cycle 2.1. [http://www.statcan.gc.ca/concepts/health-](http://www.statcan.gc.ca/concepts/health-sante/cycle2_1/pdf/cchs-escc-fra.pdf)  
10 673 [sante/cycle2\\_1/pdf/cchs-escc-fra.pdf](http://www.statcan.gc.ca/concepts/health-sante/cycle2_1/pdf/cchs-escc-fra.pdf). 2003. Accessed 4 June 2011.  
11 674 39. Pi-Sunyer FX. Obesity: criteria and classification. *Proc Nutr Soc* 2000;**59**:505-9  
12 675 40. Health Canada. Canadian Nutrient File. [http://webprod3.hc-sc.gc.ca/cnf-](http://webprod3.hc-sc.gc.ca/cnf-fce/index-eng.jsp)  
13 676 [fce/index-eng.jsp](http://webprod3.hc-sc.gc.ca/cnf-fce/index-eng.jsp). Accessed May 2 2011.  
14 677 41. Johns MW. A new method for measuring daytime sleepiness: the Epworth  
15 678 sleepiness scale. *Sleep* 1991;**14**:540-5  
16 679 42. Johns MW. Reliability and factor analysis of the Epworth Sleepiness Scale. *Sleep*  
17 680 1992;**15**:376-81  
18 681 43. Snyderman NL, Johnson JT, Moller M, et al. Brainstem evoked potentials in adult  
19 682 sleep apnea. *The Annals of otology, rhinology, and laryngology* 1982;**91**:597-8  
20 683 44. Kessler RC, Andrews G, Colpe LJ, et al. Short screening scales to monitor  
21 684 population prevalences and trends in non-specific psychological distress. *Psychol*  
22 685 *Med* 2002; **32**:959-76  
23 686 45. Kenny D. Mediation. <http://davidakenny.net/cm/mediate.htm#BK>. Accessed  
24 687 January 10th 2013.  
25 688 46. Sobel ME. Asymptotic confidence intervals for indirect effects in structural  
26 689 equation models. *Sociological Methodology* 1982;**13**:290-312  
27 690 47. MacKinnon DP, Fairchild AJ, Fritz MS. Mediation analysis. *Annu Rev Psychol*  
28 691 2007;**58**:593-614  
29 692 48. Oliver G, Wardle J, Gibson EL. Stress and food choice: a laboratory study.  
30 693 *Psychosom Med* 2000;**62**:853-65  
31 694 49. Moubarac J-C, Cargo M, Receveur O et al. Describing the Situational  
32 695 Contexts of Sweetened Product Consumption in a Middle Eastern Canadian  
33 696 Community: Application of a Mixed Method Design. *PLoS ONE* 2012;**7**: e44738.  
34 697 doi:10.1371/journal.pone.0044738  
35 698 50. Muzet A, Johnson LC, Spinweber CL. Benzodiazepine hypnotics increase heart  
36 699 rate during sleep. *Sleep* 1982;**5**:256-61  
37 700 51. Caron J, Liu A. A descriptive study of the prevalence of psychological distress  
38 701 and mental disorders in the Canadian population: comparison between low-  
39 702 income and non-low-income populations. *Chronic Dis Can* 2010;**30**:84-94  
40 703 52. Nishiura C, Noguchi J, Hashimoto H. Dietary patterns only partially explain the  
41 704 effect of short sleep duration on the incidence of obesity. *Sleep* 2010;**33**:753-7  
42 705  
43 706  
44 707  
45 708  
46 709  
47 710  
48 711  
49 712

1  
2  
3  
4  
5  
6  
7  
8  
9  
10  
11  
12  
13  
14  
15  
16  
17  
18  
19  
20  
21  
22  
23  
24  
25  
26  
27  
28  
29  
30  
31  
32  
33  
34  
35  
36  
37  
38  
39  
40  
41  
42  
43  
44  
45  
46  
47  
48  
49  
50  
51  
52  
53  
54  
55  
56  
57  
58  
59  
60

713  
714  
715  
716

For peer review only

1 Psychological distress mediates the association between daytime  
2 sleepiness and consumption of sweetened products: Cross-  
3 sectional findings in a Catholic Middle Eastern Canadian  
4 community.

5  
6 **Jean-Claude Moubarac<sup>a</sup>, PhD, Margaret Cargo<sup>b</sup>, PhD, Olivier  
7 Receveur<sup>c</sup>, PhD and Mark Daniel<sup>b</sup>, PhD**

8  
9 <sup>a</sup> École de Santé Publique, Université de Montréal, 1420, boul.Mont-Royal, Montréal  
10 (Québec) H2V 4P3, Canada. <sup>b</sup> School of Health Sciences, University of South Australia,  
11 GPO Box 2471, Adelaide SA 5001, Australia, <sup>c</sup> Département de Nutrition, Université de  
12 Montréal, 2405, Ch.de la Côte-Sainte-Catherine, Montréal (Québec) H3T 1A8, Canada.

13  
14  
15 **Institution where the work was performed:** École de Santé Publique, Université de  
16 Montréal, 1420, boul.Mont-Royal, Montréal (Québec) H2V 4P3, Canada

17  
18 **Corresponding author (Jean-Claude Moubarac): [jcmoubarac@gmail.com](mailto:jcmoubarac@gmail.com)**  
19 Núcleo de Pesquisas Epidemiológicas em Nutrição e Saúde, Universidade de São Paulo,  
20 Av. Dr. Arnaldo 715, 01246-904, São Paulo, SP, Brasil. Tel: 55-11-2592-2572

21  
22  
23 **Word count : 4526**

24  
25  
26 No funding was received for this study. The authors report no conflict of interests.

## Abstract

Objective: To examine the associations between consumption of sweetened products, daytime sleepiness (DS) and psychological distress (PD) in a Catholic Middle Eastern Canadian community, and to test the hypothesis that the association between DS and consumption of sweetened products is mediated by PD.

Design: Cross-sectional study

Setting: A Catholic Middle-Eastern Canadian community

Participants: 186 men and women aged between 18-60 years old

Primary and secondary outcome measures: Sweetened product consumption was measured using a food frequency questionnaire (total sugars/day). DS and PD were measured using standardized questionnaire. The generalised linear model was used to estimate associations between sweetened product consumption, age, sex, self-reported body mass index, DS and PD. Baron and Kenny's four-step approach in addition to the Sobel test were used to establish mediation.

Results: Average DS score was 8.2 (SD= 4.5) with 19.5% having excessive scores (>12). Mean PD score was 20.8 (SD= 6.2) with 11.8% having high distress scores. Average consumption of sweetened products was 15.5 g/day (SD=13.9). **Baron and Kenny's three steps to establish partial mediation were confirmed.** First, DS was associated with consumption of sweetened products ( $p<0.03$ ). Second, DS and PD were correlated ( $r=0.197$ ;  $p<0.04$ ). Third, PD was associated with consumption of sweetened products ( $p<0.01$ ) when both PD and DS were entered as predictors in a multivariate regression. **However, Baron and Kenny's fourth step to establish complete mediation was not met. The effect of DS on consumption of sweetened products controlling for PD was reduced but it was not zero.** Finally, the Sobel test was significant (2.14;  $p<0.03$ ).

Conclusion: The association between daytime sleepiness and consumption of sweetened products in the Catholic Middle Eastern Canadian community is partially mediated by psychological distress. **Further work should test this mediation relationship in larger samples and verify the potential effects of other sleep variables in this relationship.**

Key words: **Migrants**, Middle Eastern Canadian, sweetened products, **dietary sugars**, daytime sleepiness, **sleep**, psychological distress, **depression**, mediation analysis.

1  
2  
3  
4  
5  
6  
7  
8  
9  
10  
11  
12  
13  
14  
15  
16  
17  
18  
19  
20  
21  
22  
23  
24  
25  
26  
27  
28  
29  
30  
31  
32  
33  
34  
35  
36  
37  
38  
39  
40  
41  
42  
43  
44  
45  
46  
47  
48  
49  
50  
51  
52  
53  
54  
55  
56  
57  
58  
59  
60

85 Article focus:

- 86 • This study examines the association between consumption of sweetened products,  
87 daytime sleepiness and psychological distress in a Catholic Middle Eastern  
88 Canadian community
- 89 • We use Baron and Kenny's (1986) four-step approach and the Sobel test to  
90 **examine** alternative mediating models between these three variables

91 Key messages

- 92 • Daytime sleepiness is associated to the consumption of sweetened products and  
93 this association is partially mediated by psychological distress
- 94 • This study highlights that sleep, mood and diet are interconnected, and that efforts  
95 to improve diet quality must consider the psychosocial well-being of individuals

96 Strength and limitations

- 97 • The strengths include the testing of alternative mediating models and the use of  
98 well-established procedures to assess mediation
- 99 • Due to the cross-sectional nature of the study it is impossible to know the causal  
100 order of the observed associations, and the existence of bi-directional effects
- 101 • **Further work is needed to test this mediation relationship in larger samples and to  
102 verify the potential effects of sleep duration and quality of sleep in this  
103 relationship.**

## 126 Introduction

127 The prevalence of overweight/obesity and chronic diseases, as well as their associated  
128 risk factors, vary dramatically by ethnic groups in Canada[1]. Canadians of Arab (or  
129 Middle East) origin<sup>1</sup> represent more than 1.2% of the total Canadian population[2] and  
130 comprise one of the largest non-European ethnic groups in Canada. **After adjusting for  
131 socioeconomic factors, Arab Canadians are less likely to be obese than Black, Latin, and  
132 Aboriginal groups, however more likely to be obese than Chinese, Japanese, South Asian  
133 groups, as well as the White reference group** [3]. Furthermore, the prevalence of obesity  
134 is much higher amongst long-term Arab migrants ( $\geq 11$  or more years) than the more  
135 recent migrants ( $\leq 10$  years) to Canada[1]. The high prevalence of obesity amongst Arabs  
136 and the finding that the prevalence increases with time may result from the adoption of  
137 dietary and behavioural risk factors uncommon to the environment of their home  
138 countries prior to migration and acquired during the acculturation process in Canada[1, 4,  
139 5].

140  
141 A modifiable dietary risk factor contributing to the development of obesity is the  
142 consumption of ultra-processed products high in dietary sugars, or sweet food and drink  
143 products [6]. Such products include soft drinks, sweetened juices and beverages, candies  
144 and chocolates, sugary baked goods, ice creams, and other desserts[7]. These products  
145 share many nutritional characteristics that make them unhealthy; they are energy dense  
146 (for solids), they have an excessive content in free sugars, and some are also high in fats  
147 and saturated fats[8]. Furthermore, they are sold in large portion sizes and are commonly  
148 consumed as snacks both of which may contribute to energy imbalance[9]. Even more  
149 problematic is the fact that sweetened products have specific psychological properties  
150 that trigger consumption; they are hyper-palatable [10-12] and their sweet taste works to  
151 alleviate dysphoric mood or stress through dopaminergic and opioidergic neuro-  
152 transmission in the brain[13-15].

153

---

<sup>1</sup> Denotes people from the Middle East or North African region who reported Arab (or an origin that originates in the region commonly referred to as the Arab world), either alone or in combination with other ethnic origins in response to the question on ethnic origin in the 2001 Census or 2002 Ethnic Diversity Survey. In this paper, the terms Arab and Middle Eastern are used interchangeably.



1  
2  
3 154 Middle Easterners are known for the daily consumption of sweet tea. However, other  
4  
5 155 sweetened products have a secondary role in traditional Middle Eastern cuisine in that  
6  
7 156 they are mostly home-prepared pastries and deserts most frequently consumed during  
8  
9 157 festivities and on special occasions [16, 17]. Young Egyptian women and men more often  
10  
11 158 reported cravings for savories (meat and vegetables based dishes) than cravings for  
12  
13 159 sweets, contrary to studies conducted in Canada and United States [18]. However, the  
14  
15 160 quantity, use and significance of sweetened products have significantly changed in the  
16  
17 161 last decades in Lebanon, Egypt and Syria, with a parallel increase in obesity and chronic  
18  
19 162 diseases [16, 19, 20]. Similarly, Arabs are exposed to a new food environment when they  
20  
21 163 migrate to Canada where sweetened products are abundant, cheap, convenient,  
22  
23 164 accessible, and part of the mainstream food culture. Such an experience creates a variety  
24  
25 165 of social and economic challenges for maintaining ethnic cuisine as a marker of  
26  
27 166 community affiliation and may be a potential source of stress and anxiety [21].  
28

29  
30 167  
31 168 Understanding why individuals consume sweetened products is a complex issue,  
32  
33 169 especially given the psychological properties of these products and their effects in the  
34  
35 170 brain. A review of the literature suggests that two sets of inter-related psychosocial  
36  
37 171 factors are associated with the consumption of sweetened products; sleep-related  
38  
39 172 problems and mood/stress-related problems. However, the nature of the relationships  
40  
41 173 between these factors is not well understood [22].  
42

43  
44 174  
45 175 Excessive daytime sleepiness is characterized by persistent sleepiness and lack of energy,  
46  
47 176 most often caused by sleep deprivation, obstructive sleep apnea and/or use of medication  
48  
49 177 [23]. It is present in all individuals, regardless of age, and recognized as the first  
50  
51 178 symptom that defines narcolepsy [24]. Both excessive daytime sleepiness [25, 26] and  
52  
53 179 narcolepsy [24] have been associated with the development and/or exacerbation of  
54  
55 180 obesity. One potential mechanism explaining this association is through effects on  
56  
57 181 appetite and intake of food[22]. Indeed, excessive daytime sleepiness has been associated  
58  
59 182 with the consumption of food high in fats, as well as refined carbohydrates[22]. A recent  
60  
183 study found that excessive daytime sleepiness was associated with the consumption of  
184 refined carbohydrate-rich snacks amongst Japanese children[27]. A very-low

1  
2  
3 185 carbohydrate, high-protein diet has shown improvement in daytime alertness in adults  
4  
5 186 patients with narcolepsy[28]. In another study, subjects fed a carbohydrate liquid diet  
6  
7 187 scored higher for subjective fatigue than those fed with a high-fat or a high-protein diet  
8  
9 188 [29]. Hormonal, metabolic, and inflammatory mechanisms could explain why a diet high  
10  
11 189 in fats and/or sugars could induce somnogenic effects in the body [22].  
12  
13 190

14 191 There is evidence that the association between daytime sleepiness and sweetened  
15  
16 192 products may be explained by the mediating effects of mood/stress problems, such as  
17  
18 193 psychological distress. This mediating effect is supported in the literature for **some of**  
19  
20 194 Baron and Kenny's criteria to establish mediation[30]. First, there is supporting evidence  
21  
22 195 that daytime sleepiness is associated with consumption of processed food high in dietary  
23  
24 196 sugars [27,28]. Second, daytime sleepiness is correlated with depression and  
25  
26 197 psychological distress in both Western and Arab populations [31-34]. Third, a preference  
27  
28 198 for chocolate and other sweetened products is well documented in depressed and  
29  
30 199 psychological distressed individuals[35, 36]. This preference could be explained by the  
31  
32 200 effects of sweets on relieving mood or stress [13-15]. If sleepy individuals also tend to  
33  
34 201 feel distressed, and psychological distress induces the consumption of sweetened  
35  
36 202 products, then the relationship between daytime sleepiness and the consumption of these  
37  
38 203 products could be, at least, partially mediated by psychological distress.  
39  
40 204

41 205 Daytime sleepiness and psychological distress, and their relationship to the consumption  
42  
43 206 of sweetened products have never been studied in Arab Canadians. Addressing this gap  
44  
45 207 could shed light on the prevention/management of obesity in the Canadian Arab  
46  
47 208 community. The burden of obesity in this community has important human and economic  
48  
49 209 consequences for the Canadian public health system because Arabs are one of the fastest  
50  
51 210 growing migrant groups in Canada, constituting more than 4% of the urban population of  
52  
53 211 Montreal and Ottawa[2]. Understanding the relationship between daytime sleepiness,  
54  
55 212 psychological distress and diet could provide useful information to improve daytime  
56  
57 213 alertness, psychological well-being and diet quality, all of which are known risk factors  
58  
59 214 to obesity and chronic diseases. From this perspective, this paper has two objectives: 1) to  
60  
215 **assess** the prevalence of excessive daytime sleepiness and psychological distress in an

1  
2  
3 216 Arab community living in Montreal[2], and 2) to test whether the relationship between  
4  
5 217 daytime sleepiness and consumption of sweetened products is mediated by psychological  
6  
7 218 distress using Baron and Kenny's [30] criteria and the Sobel test.  
8  
9 219

10 220 **Methods:**

11 221 *Participants*

12 222 The Middle Eastern or Arab community living in Canada is heterogeneous in terms of its  
13  
14 223 country of birth and religious affiliation. The main groups are Lebanese (41%), Egyptian  
15  
16 224 (12%), Syrian (6%), Moroccan (6%), and Iraqi (6%)[2]. Canadians of Arab origin are  
17  
18 225 equally divided between Muslims and Christians, of which the majority is Catholic[2].  
19  
20 226 The sociocultural heterogeneity within the Middle Eastern community is essential to  
21  
22 227 acknowledge, especially because religious beliefs impose dietary restrictions and may  
23  
24 228 influence psychosocial factors related to health in Arab Muslims [21, 37].  
25  
26 229

27  
28 230 The target population of this study is an established Catholic Middle Eastern community  
29  
30 231 living in Montreal, Canada. This population is composed of first and second generation  
31  
32 232 migrants, mostly from Egypt, Lebanon and Syria. Recruitment and data collection  
33  
34 233 occurred at three Catholic Middle Eastern churches located in Montreal. Participation  
35  
36 234 was solicited through public announcements and was limited to one respondent per  
37  
38 235 household to avoid bias related to family customs. Subjects were all volunteers and could  
39  
40 236 withdraw from the study at any point.  
41

42 237

43 238 The research protocol was submitted and approved by the ethics committee of the Centre  
44  
45 239 Hospitalier de l'Université de Montréal (SL 06-063). All participants provided informed  
46  
47 240 written consent.  
48

49 241

50 242 *Instruments*

51 243 Socio-demographic characteristics were collected using a self-reported questionnaire  
52  
53 244 adapted from Health Canada[38]. Physical activity was assessed by asking the question  
54  
55 245 "how many times per week do you exercise enough to sweat? " **Five response categories**  
56  
57 246 **were provided ranging from 0 to 4 or more times per week.** Participants also self-reported  
58  
59  
60

1  
2  
3 247 height and weight. BMI was calculated as weight (kg)/ height (m)<sup>2</sup> and categorized as  
4 248 normal weight (BMI < 25); overweight 25 ≥ BMI < 30); and obese (BMI > 30) [39].  
5  
6

7 249  
8 250 Food consumption was assessed using a food frequency questionnaire (FFQ) previously  
9 251 developed and pretested with the study community to measure consumption of 26  
10 252 different sweet food and drink products [7]. This questionnaire is easy to read and to  
11 253 understand, and culturally relevant to the study community. To answer the FFQ,  
12 254 respondents reported the average number of days per week, in a typical week, in which  
13 255 each listed product was eaten or drank (i.e., excluding festivities). Participants were also  
14 256 asked to report how many portions of the food item they typically ate. Examples of  
15 257 portions sizes were taken from the Canadian Nutrient File (CNF) and provided to  
16 258 participants[40]. For the purpose of this study, we selected food items representing  
17 259 sweetened products, which include cookies, chocolate, cakes and candies.  
18  
19  
20  
21  
22  
23  
24  
25  
26  
27

28 261 Daytime sleepiness was measured using the self-report *Epworth Sleepiness Scale* (ESS)  
29 262 [41]. Respondents used a four-point scale (0 to 3) to express their perceived likelihood of  
30 263 falling asleep during the day in eight different situations (sitting and reading, watching  
31 264 television, sitting inactive in a public place, as a passenger in a car for an hour without a  
32 265 break, lying down to rest in the afternoon when circumstances permit, sitting and talking  
33 266 to someone, and sitting quietly after a lunch without alcohol). The ESS instrument has a  
34 267 high internal consistency (Cronbach's alpha = 0.88) and a high test-retest reliability after  
35 268 5 months (r = 0.82)[42]. For descriptive purposes, daytime sleepiness scores on the ESS  
36 269 were coded into three levels of increasing daytime sleepiness: low (ESS scores 0-5),  
37 270 intermediate (ESS scores 6-11) and high (ESS scores 12-24). Intermediate (6-11) and  
38 271 high (12-24) ESS scores were shown to have a 30% and 69% increased risk for sleep  
39 272 onset during the Multiple Sleep Latency Test (MSLT), an objective measure of daytime  
40 273 sleep tendency [43].  
41  
42  
43  
44  
45  
46  
47  
48  
49  
50  
51

52 274  
53 275 Psychological distress was measured using the *Kessler Psychological Distress Scale*  
54 276 (K10) [44]. This instrument is composed of 10 questions on anxiety and depressive  
55 277 symptomology. Respondents self-reported the degree to which they had these feelings for  
56  
57  
58  
59  
60

1  
2  
3 278 the month prior to completing the instrument using a five-point Likert scale (all the time,  
4  
5 279 often, sometimes, rarely, never). Scores, ranging from 10 to 50, represent an increasing  
6  
7 280 gradient of psychological distress. The K10 instrument has a high internal consistency  
8  
9 281 (Cronbach's alpha = 0,92) [44]. For descriptive purposes, psychological distress scores  
10  
11 282 on the K10 were grouped into standard groups as low (10-20), moderate (21-29) and high  
12  
13 283 levels of psychological distress (30-50) [44].  
14

284

285 *Analysis*

17 286 Data were analyzed using SPSS (Version 18.0). As a first step, we present descriptive  
18  
19 287 data on the consumption of sweetened products according to sex, age, body mass index  
20  
21 288 (BMI), physical activity, daytime sleepiness, and psychological distress. Consumption of  
22  
23 289 sweetened products corresponded to the daily amount of total sugars eaten from cakes,  
24  
25 290 cookies, chocolate, and candies. This was calculated using data on the frequency and  
26  
27 291 portions consumed from these products obtained from the FFQ, and the estimated amount  
28  
29 292 of total sugars contained in mean portions of these products using CNF.  
30

293

31 294 As a second step, univariate regression analysis was performed to estimate the  
32  
33 295 associations between consumption of sweetened products and age, sex, physical activity,  
34  
35 296 BMI, daytime sleepiness and psychological distress. Similar tests were performed to  
36  
37 297 verify if the consumption of sweetened products varied by other socio-demographics  
38  
39 298 (country of birth, time since migration, family income, education level, civil status and  
40  
41 299 employment status). For all regression analyses, consumption of sweetened products was  
42  
43 300 log-transformed. Physical activity was used as a ordinal measure using the five answer  
44  
45 301 choices (0-4 times or more per week). All other variables were used as continuous  
46  
47 302 measures.  
48

303

49 304 Next, we applied the Baron and Kenny [30,45] criteria to assess whether the relationship  
50  
51 305 between daytime sleepiness (independent variable) and consumption of sweetened  
52  
53 306 products (dependent variable) was mediated by psychological distress (mediator).  
54  
55 307 According to Baron and Kenny four statistical conditions need to be met in order to  
56  
57 308 establish complete mediation and three conditions to establish partial mediation [30, 45].  
58  
59  
60

1  
2  
3 309 First, univariate regression was used to test if daytime sleepiness was significantly  
4 associated with consumption of sweetened products. Second, we assessed whether  
5 310  
6 daytime sleepiness and psychological distress were significantly associated. Third, we  
7 311  
8 tested whether psychological distress (mediator) was associated with the consumption of  
9 312  
10 sweetened products when both daytime sleepiness and psychological distress were  
11 313  
12 entered as predictors in a multivariate regression analysis. **Fourth, to establish that**  
13 314  
14 **psychological distress completely mediates the relationship between daytime sleepiness**  
15 315  
16 **and consumption of sweetened products, we examined whether the effect of daytime**  
17 316  
18 **sleepiness on consumption of sweetened products controlling for psychological distress**  
19 317  
20 **was zero. If the first three steps are met but the Step 4 is not, then partial mediation is**  
21 318  
22 **indicated [45].** The Sobel test was used to statistically evaluate whether the indirect effect  
23 319  
24 of the independent variable on the dependent variable through the mediator variable was  
25 320  
26 significant[46].  
27 321  
28 322

28 323 As a final step, we ran alternative mediation models to rule out plausible competing  
29 324  
30 interpretations of the data and to verify whether our hypothesized model best fit the data.  
31 325  
32 First, daytime sleepiness was entered as the mediator of the relationship between  
33 326  
34 psychological distress (independent) and consumption of sweetened products  
35 327  
36 (dependent). In a second alternative model, consumption of sweetened products was  
37 328  
38 entered as the mediator of the relationship between daytime sleepiness (independent  
39 329  
40 variable) and psychological distress (dependent variable).  
41 330

## 42 331 **Results**

43 332  
44 Participants were aged between 18 and 60 years (Mean = 34.6; Standard deviation (SD) =  
45 333  
46 12.5). There were slightly more women (*n* 101) than men (*n* 85). Country of birth  
47 334  
48 included Egypt (31.9 %), Lebanon (25.1 %), Syria (14.7 %), and other Middle Eastern  
49 335  
50 countries (5.3 %). Individuals migrated between 1962 and 2007, of which 86% arrived  
51 336  
52 before 2000, meaning they have spent more than 10 years in Canada. An additional  
53 337  
54 23.0% of subjects were born in Canada; these were second-generation migrants (i.e.,  
55 338  
56 children of immigrating parents born in the Middle Eastern). Participant's civil status was  
57 339  
58 as follows; married or engaged (47.3%), single (46.2%), separated/divorced (4.3%), and  
59  
60

1  
2  
3 340 widowed (2.2%). The vast majority of respondents had at least a college diploma  
4 (88.0%), and most had a university degree (65.8%). Most participants had a family  
5 341 income above CAD \$50,000 (66.9%).  
6  
7 342  
8  
9 343

10 344 Average consumption of sweetened products was of 15.5 g/day (SD=13.9; *n* 186) with  
11 the range from 0 to 93.1 g/day. The share of each food item to the amount of total sugars  
12 345 from these products was as follows; cakes (51.3%), chocolate (24.7%), cookies (16.1%)  
13 346 and candies (7.9 %).  
14  
15  
16 347  
17  
18 348

19 349 The average daytime sleepiness score on ESS was 8.2 (SD= 4.5) (*n* 186). A third of  
20 350 individuals (30.1%) had a low daytime sleepiness score (0-5) and half (50.5%) had an  
21 intermediate daytime sleepiness score (6-11). One-fifth of individuals (19.5%) had a high  
22 351 daytime sleepiness score (12-24). Almost one-third of individuals met the clinical criteria  
23 352 for excessive daytime sleepiness (EDS) (defined as ESS scores above 10). Daytime  
24 353 sleepiness did not vary by sex, age or BMI.  
25  
26 354  
27  
28  
29  
30  
31 355

32 356 The average psychological distress score on the K10 was 20.8 (SD= 6.2) (*n* 186).  
33 357 More than one half the respondents (55.4%) had a low distress score of 0-20; one-third  
34 358 (32.8%) had a moderate distress score of 21-30; and one-tenth had a high distress score of  
35 359 30-50 (11.8%). Psychological distress did not vary by sex, age or BMI.  
36  
37  
38  
39 360

40  
41 361 Table 1 presents descriptive data on the consumption of sweetened products according to  
42 age, sex, physical activity, BMI, daytime sleepiness, and psychological distress. Females  
43 362 consumed slightly more sweetened products than males (1.7g/day), while patterns for age  
44 363 and BMI were less defined. Importantly, the consumption of sweetened products varied  
45 364 according to psychological distress and daytime sleepiness score levels. Individuals with  
46 365 high distress ate an additional 5.6g of total sugars/day, 45% more than individuals with  
47 366 moderate distress, and an additional 8.5g of total sugars/day, 68% more than individuals  
48 367 with low distress. Individuals with high daytime sleepiness (>12) ate an additional 2.9g  
49 368 of total sugars/day, 23% more than subjects with moderate daytime sleepiness, and an  
50 369 additional 6.9g of total sugars/day, 54% more than individuals with low daytime  
51  
52  
53  
54  
55 370  
56  
57  
58  
59  
60

1  
2  
3 371 sleepiness. Other socio-demographics were not related statistically to the consumption of  
4  
5 372 sweetened products.  
6

7 373

8  
9 374 Table 1 also presents the results of univariate regression analyses between consumption  
10  
11 375 of sweetened products (log-transformed) and age, sex, BMI, daytime sleepiness, and  
12  
13 376 psychological distress. Consumption of sweetened products did not vary significantly by  
14  
15 377 age, sex or BMI. The consumption of sweetened products was positively associated with  
16  
17 378 psychological distress ( $p<0.00$ ), as well with daytime sleepiness ( $p<0.04$ ).  
18

19 379

20 380 Multivariate analysis (Table 2) consisted of simultaneous modeling daytime sleepiness  
21  
22 381 and psychological distress. In this model, the association between psychological distress  
23  
24 382 and consumption of sweetened products remained statistically significant ( $p<0.01$ ),  
25  
26 383 whereas the relationship with daytime sleepiness **was no longer** significant ( $p<0.09$ ).  
27

28 384

29 385 **We were able to verify the first three steps of Baron and Kenny[30] to establish**  
30  
31 386 **mediation.** First, daytime sleepiness was significantly associated with the consumption of  
32  
33 387 **sweetened** products ( $p<0.04$ ). Second, daytime sleepiness and psychological distress were  
34  
35 388 significantly correlated ( $r=0.15$ ;  $p<0.04$ ). Third, psychological distress was associated  
36  
37 389 with the consumption of **sweetened** products ( $p<0.01$ ) when both psychological distress  
38  
39 390 and daytime sleepiness were entered as predictors in the multivariate regression model.  
40  
41 391 **However, the fourth step was not met. In our analysis, the effect of daytime sleepiness on**  
42  
43 392 **consumption of sweetened products controlling for psychological distress was reduced**  
44  
45 393 **but it was not zero. Finally,** the Sobel test showed that the indirect effect of the  
46  
47 394 independent variable on the dependent variable through the mediator variable was  
48  
49 395 significant (Sobel statistic=2.14; SE=0.01;  $p<0.03$ ).  
50

51 396

52 397 In order to strengthen the robustness of the results, two alternative mediation models  
53  
54 398 were tested. In the first alternative model, Baron and Kenny's third criteria was not  
55  
56 399 satisfied. Indeed, daytime sleepiness (mediator) was not associated ( $p<0.15$ ) with  
57  
58 400 psychological distress (dependent) when both daytime sleepiness and consumption of  
59  
60 401 sweetened products (independent) were entered as predictors in a multivariate regression



1  
2  
3 402 analysis. In the second alternative model, all first three Baron and Kenny's criteria were  
4 403 satisfied. However, comparing both models using Akaike information criterion (AIC)  
5 404 indicated that the hypothesized mediation model (AIC=848) is a far better fit than this  
6 405 second alternative model (AIC=1205). Furthermore, the Sobel test for the second  
7 406 alternative mediation model showed that the indirect effect of the independent variable on  
8 407 the dependent variable through the mediator variable was not significant (Sobel  
9 408 statistic=1.63 SE=0.12;  $p < 0.1$ ).

10  
11  
12  
13  
14  
15  
16 409  
17 410 Lastly, the robustness of our analyses could be biased by the moderate association that  
18 411 exists between daytime sleepiness and the K10 instrument first item (K1) that assesses  
19 412 fatigue/tiredness ( $r = 0.18$ ;  $p < 0.02$ ). To verify this, we repeated our analyses by using a  
20 413 total score of K9 (i.e., K10 after excluding item #1). This did not change the nature of our  
21 414 results because 1) daytime sleepiness and K9 were still significantly correlated ( $r = 0.14$ ;  
22 415  $p < 0.04$ ); 2) K9 was associated with the consumption of sweetened products ( $\beta = 0.17$ ;  
23 416  $p < 0.02$ ) when both K9 and daytime sleepiness were entered as predictors in the  
24 417 multivariate regression model, and 3) the effect of daytime sleepiness on consumption of  
25 418 sweetened products controlling for psychological distress was reduced but it was not  
26 419 zero.

## 420 421 **Discussion**

422 The data presented in this paper show that the level of daytime sleepiness in the Catholic  
423 Middle Eastern Canadian community is statistically associated with higher consumption  
424 of sweetened products, such as chocolate, candies, cakes and cookies. Most importantly,  
425 we found that the first three criteria defined by Baron and Kenny to establish mediation  
426 were met, but that the fourth criteria was not. The results suggest that the relationship  
427 between daytime sleepiness and consumption of sweetened products is partially mediated  
428 by the level of psychological distress.

429  
50  
51  
52  
53 430 The strengths of this study are the use of well-established procedures to assess mediation  
54 431 - Baron and Kenny's (1986) four-step approach and the Sobel test, and the examination  
55 432 of alternative mediating models. Our analysis, however, was based on assumptions of  
56  
57  
58  
59  
60

1  
2  
3 433 having a correctly specified mediation model, including no misspecifications of causal  
4 434 order and of causal direction, or of imperfect measurements and unmeasured variables  
5 435 [47]. In reality, such assumptions are difficult or even impossible to achieve. By testing  
6 436 alternative mediate models we showed that the one we described is the best fitted to  
7 437 account for the relationship between these three variables. Furthermore, data from prior  
8 438 research support the proposition that a mediation relation exists between these variables.  
9 439

10 440 The relationship observed between daytime sleepiness and consumption of food high in  
11 441 dietary sugars is consistent with previous studies conducted in western and non-western  
12 442 settings [27-29]. Similarly, previous work provides strong support that the consumption  
13 443 of sweetened products is triggered by negative emotional or distress feelings in western  
14 444 populations. Negative mood (as measured by anxiety, fatigue and depression scales) has  
15 445 been correlated with craving intensity for sweet food [36]. Experimental studies have also  
16 446 demonstrated an association between stress or negative mood and the consumption of  
17 447 savory foods in emotional eaters [35, 48]. Thus one explanation in support of our  
18 448 mediating model is that individuals who experience daytime sleepiness may consume  
19 449 energy dense sugary rich foods to upgrade their energy level or to alleviate their negative  
20 450 mood or psychological distress. This explanation fits with the fueling and emotional  
21 451 functions attributed to sweetened food and drink products by members of the studied  
22 452 community in semi-structured interviews [49]. Furthermore, this explanation has  
23 453 biological plausibility since sweet taste may alleviate dysphoric mood or stress through  
24 454 dopaminergic and opioidergic neurotransmission in the brain [13-15].  
25 455

26 456 *It would be interesting to explore which of anxiety or depression correlate stronger with*  
27 457 *daytime sleepiness since the K10 instrument contains items that assesses both symptoms.*  
28 458 *However, this instrument is used as a single scale because anxiety and depression items*  
29 459 *are highly correlated. There is nevertheless evidence that both anxiety and depression are*  
30 460 *highly correlated with excessive daytime sleepiness and fatigue [34].*  
31 461

32 461

1  
2  
3 462 Our study highlights that sleep, mood and diet are interconnected, and that efforts to  
4  
5 463 improve diet quality must consider the psychosocial well-being of individuals, especially  
6  
7 464 given the known properties of sweets to temporarily alleviate fatigue, stress and anxiety.  
8  
9 465 These results have important public health implications for the prevention of obesity and  
10  
11 466 chronic diseases, which are growing concerns in the Arab Canadian community[3].  
12  
13 467 Indeed, consumption of processed products high in dietary sugars is recognized as an  
14  
15 468 important contributor to the development of these diseases[6]. As reported elsewhere, the  
16  
17 469 consumption level of total sugars (all foods considered), ~ 20% of diet, in this community  
18  
19 470 is now similar that of the Canadian and Quebec population[7]. The average daytime  
20  
21 471 sleepiness score (8.2) and the prevalence of EDS (28%) measured in this paper are within  
22  
23 472 the range noted in western countries[50]. The obesity prevalence of 15.6% is also similar  
24  
25 473 to the Canadian average and the general Arab community, when self-reported measures  
26  
27 474 are taken[3].  
28  
29 475

30 476 The prevalence of high psychological distress (K10>30) at 11.8% is nearly half that of  
31  
32 477 the Canadian average, reported to be 20.7% [51]. It is possible that sociocultural factors  
33  
34 478 such as family social support or having a religious faith protect against anxiety and  
35  
36 479 depression. Religious affiliation, for example, is higher in the Middle Eastern community  
37  
38 480 (94%) than in the overall population (83%)[2]. Also, the strength and size of social  
39  
40 481 network shown to have tempering effect on weight gain and the general health of  
41  
42 482 individuals living in large Canadian ethnic groups [5]. The sources of psychological  
43  
44 483 distress in the Middle Eastern Canadian community are, however, unknown and warrant  
45  
46 484 future research. Socioeconomic difficulties do not seem to play an essential role in our  
47  
48 485 population sample, since employment rate, education level and household income were  
49  
50 486 found to be relatively high. The difficulties of maintaining traditional dietary practices in  
51  
52 487 the host country may be potential sources of social and economic stress [21].  
53  
54 488

55 489 **In our analysis, BMI had a positive, but not significant association with daytime**  
56  
57 490 **sleepiness. In a previous paper, we observed an inverse (but not significant) relationship**  
58  
59 491 **between consumption of sweetened products and BMI in the same community [7]. These**  
60  
61 492 **results, however, must be interpreted by taking into account that overweight and obese**

1  
2  
3 493 subjects may have under-reported their weight or under-reported their consumption of  
4  
5 494 sweetened products, but also the cross-sectional design.  
6  
7 495

8  
9 496 This study has limitations. First, the sample size was small and thus statistical power was  
10 497 limited. However, the composition of our sample reflects the characteristics of the  
11  
12 498 general Catholic Middle Eastern Canadian community in terms of birthplace, religious  
13  
14 499 affiliation, education and income[2]. Our findings, however, cannot be generalized to the  
15  
16 500 Muslim Arab Canadian community. Second, the study is based on self-reported  
17  
18 501 measures. However, both instruments we used (ESS and K10) are valid and reliable  
19  
20 502 instruments widely used in both sleep and mood-related studies. Third, we did not  
21  
22 503 account for other sleep problem measures, including duration of sleep and sleep  
23  
24 504 deprivation, as well as other potential confounding disorders. Sleep duration and  
25  
26 505 obstructive sleep apnea are the most common causes of daytime sleepiness[22], but  
27  
28 506 studies examining the relationships between sleep duration, dietary intake and obesity has  
29  
30 507 produced mixed results[52]. Fourth, findings are based on cross-sectional data. Therefore,  
31  
32 508 it is impossible to know the causal order of the observed associations, and the existence  
33  
34 509 of bi-directional effects, for example, between the consumption of foods high in dietary  
35  
36 510 sugars and daytime sleepiness.

37 511

## 38 512 **Conclusion**

39 513 This study expands the limited evidence base concerning the association between  
40  
41 514 consumption of sweetened products, daytime sleepiness and psychological distress in any  
42  
43 515 communities including migrants ones. One novel contribution of this study is its  
44  
45 516 inclusion of a measure of psychological distress and the use of Baron and Kenny's [30,  
46  
47 517 44] four-step approach and the Sobel test to establish that the consumption of sweetened  
48  
49 518 products and daytime sleepiness is partially mediated by psychological distress. One  
50  
51 519 possible explanation in support of this relationship is that individuals experiencing  
52  
53 520 daytime sleepiness may reach for energy dense sugary rich foods in order to upgrade their  
54  
55 521 energy level or to alleviate their psychological distress. Further work is needed to test this  
56  
57 522 mediation relationship in larger samples and to verify the potential effects of sleep  
58  
59 523 duration and quality of sleep in this relationship.  
60

**Table 1** Consumption of sweetened products (total sugars/day) according to age, sex, BMI, physical activity, BMI, psychosocial distress and daytime sleepiness scores (*n* 186).

| Factors                             | Subjects |      | Sweetened products (g/day) |     | P <* |
|-------------------------------------|----------|------|----------------------------|-----|------|
|                                     | <i>n</i> | %    | Mean                       | SE  |      |
| Sex                                 |          |      |                            |     | 0.66 |
| Male                                | 85       | 45.7 | 14.6                       | 1.5 |      |
| Female                              | 101      | 54.3 | 16.3                       | 1.4 |      |
| Age                                 |          |      |                            |     | 0.59 |
| 18-30                               | 83       | 44.6 | 19.5                       | 1.6 |      |
| 31-40                               | 50       | 26.9 | 12.7                       | 1.7 |      |
| 41-50                               | 21       | 11.3 | 17.2                       | 4.2 |      |
| 51-60                               | 32       | 17.2 | 12.4                       | 1.8 |      |
| Physical activity                   |          |      |                            |     | 0.31 |
| No activity                         | 57       | 30.6 | 16.6                       | 1.8 |      |
| 1 time per week                     | 50       | 26.9 | 17.3                       | 2.1 |      |
| 2 times per week                    | 31       | 16.7 | 13.4                       | 2.2 |      |
| 3 times per week                    | 30       | 16.1 | 11.4                       | 1.6 |      |
| ≥ 4 times per week                  | 18       | 9.7  | 17.3                       | 5.0 |      |
| Body mass index                     |          |      |                            |     | 0.86 |
| Normal (18.5-24.9)                  | 88       | 44.6 | 16.5                       | 1.5 |      |
| Overweight (25-29.9)                | 69       | 37.1 | 13.6                       | 1.4 |      |
| Obese(>30)                          | 29       | 15.6 | 17.1                       | 3.3 |      |
| Psychological distress (K10 scores) |          |      |                            |     | 0.00 |
| Low (10-20)                         | 103      | 55.4 | 12.7                       | 1.1 |      |
| Moderate (21-30)                    | 61       | 32.8 | 18.3                       | 1.8 |      |
| High (30-50)                        | 22       | 11.8 | 21.2                       | 4.3 |      |
| Daytime sleepiness (ESS scores)     |          |      |                            |     | 0.04 |
| Low (0-5)                           | 56       | 30.1 | 12.7                       | 1.5 |      |
| Moderate (6-11)                     | 94       | 50.5 | 15.6                       | 1.5 |      |
| High (12-24)                        | 36       | 19.4 | 19.6                       | 2.3 |      |

\*In the univariate regression analysis, sweetened products was log-transformed and all variables were entered as continuous (age, BMI, psychological distress scores (10-50) and daytime sleepiness scores (0-24). Physical activity categories were created by asking "how many times per week do you exercising enough to sweat?" and answers ranged from 0-4 or more times per week.

540 **Table 2** Relationships between consumption of sweetened products, daytime sleepiness and  
 541 psychological distress in the multivariate model (*n* 186)

|                        | $\beta$ | SE   | $S\beta$ | T value | P<   |
|------------------------|---------|------|----------|---------|------|
| Model <sup>1</sup>     |         |      |          |         |      |
| Daytime sleepiness     | 0.05    | 0.02 | 0.16     | 2.15    | 0.04 |
| Model <sup>2</sup>     |         |      |          |         |      |
| Constant               | 2.75    | 0.54 |          | 5.10    | 0.00 |
| Daytime sleepiness     | 0.03    | 0.02 | 0.12     | 1.69    | 0.09 |
| Psychological distress | 0.05    | 0.02 | 0.19     | 2.61    | 0.01 |

543  $\beta$  = Beta coefficient;  $S\beta$  = standardized Beta coefficient; SE= standard error

544 Consumption of sweetened products was log-transformed. Psychological distress scores (10-50) and  
 545 daytime sleepiness scores (0-24) are entered as continuous and are normally distributed.

546 <sup>1</sup> Model summary: R=0.15, F=4.26, p<0.04; <sup>2</sup> Model summary: R=0.27, F=2.37, p<0.03, adjusted for  
 547 psychological distress (mediator) and age.

1  
2  
3 576

4 577

**References**

5 578

6 579

7 580

8 581

9 582

10 583

11 584

12 585

13 586

14 587

15 588

16 589

17 590

18 591

19 592

20 593

21 594

22 595

23 596

24 597

25 598

26 599

27 600

28 601

29 602

30 603

31 604

32 605

33 606

34 607

35 608

36 609

37 610

38 611

39 612

40 613

41 614

42 615

43 616

44 617

45 618

46 619

47 620

48 621

49

50

51

52

53

54  
55  
56  
57  
58  
59  
60

1. Tremblay MS, Perez CE, Ardern CI, et al. Obesity, overweight and ethnicity. *Health Rep* 2005; **16**:23-34
2. Health Canada. *The Arab community*. 2007 Ottawa: Canada.
3. Liu R, So L, Mohan S, et al. Cardiovascular risk factors in ethnic populations within Canada: results from national cross-sectional surveys 2010; *Open medicine*:e143-53
4. Nakanishi S, Okubo M, Yoneda M, et al. A comparison between Japanese-Americans living in Hawaii and Los Angeles and native Japanese: the impact of lifestyle westernization on diabetes mellitus. *Biomedicine & pharmacotherapy* 2004;**58**:571-7
5. McDonald JT, Kennedy S. Is migration to Canada associated with unhealthy weight gain? Overweight and obesity among Canada's immigrants. *Social science & medicine* 2005;**61**:2469-81
6. World Health Organization Diet. Nutrition and the Prevention of Chronic Diseases. Report of the joint WHO/FAO expert consultation. WHO Technical Report Series no. 916. 2003 Geneva: WHO.
7. Moubarac J-C, Receveur O, Cargo M, et al. Consumption patterns of sweetened food and drink products in a Catholic Middle Eastern Canadian Community. *Public Health Nutrition*; 2012 doi:10.1017/S1368980012005460
8. Moubarac J-C, Martins AP, Claro RM, Levy RB, Cannon G, & Monteiro, CA Consumption of ultra-processed foods and likely impact on human health. Evidence from Canada. *Public Health Nutrition*. 2012. Available on CJO doi:10.1017/S1368980012005009
9. Chapelot D. The role of snacking in energy balance: a biobehavioral approach. *The Journal of nutrition* 2011;**141**:158-62
10. Lustig RH, Schmidt LA, Brindis CD. Public health: The toxic truth about sugar. *Nature* 2012;**482**:27-9
11. Drewnowski A. The real contribution of added sugars and fats to obesity. *Epidemiologic reviews* 2007;**29**:160-71
12. Levine AS, Kotz CM, Gosnell BA. Sugars: hedonic aspects, neuroregulation, and energy balance. *The American journal of clinical nutrition* 2003;**78**:834S-42S
13. Gibson, EL. Emotional influences on food choice: sensory, physiological and psychological pathways. *Physiology & Behavior* 2006;**89**:53-61
14. Adam TC, Epel ES. Stress, eating and the reward system. *Physiology & Behavior* 2007;**91**:449-58
15. Macht M. How emotions affect eating: A five-way model. *Appetite* 2008;**50**:1-11
16. Hassan-Wassef H. Food habits of the Egyptians: newly emerging trends. *Eastern Mediterranean health journal* 2004;**10**:898-915
17. Issa C, Salameh P, Batal M, et al. The nutrient profile of traditional Lebanese composite dishes: comparison with composite dishes consumed in France. *International journal of food sciences and nutrition* 2004;**60** Suppl 4:**285**-95
18. Parker S, Kamel N, Zellner D Food craving patterns in Egypt: comparisons with North America and Spain. *Appetite* 2003;**40**:193-5

- 1  
2  
3 622 19. Nasreddine L, Hwalla N, Sibai A, et al. Food consumption patterns in an adult  
4 623 urban population in Beirut, Lebanon. *Public health nutrition* 2006; **9**:194-203  
5 624 20. Musaiger AO, Al-Hazzaa, HM. Prevalence and risk factors associated with  
6 625 nutrition-related noncommunicable diseases in the Eastern Mediterranean region.  
7 626 *International journal of general medicine* 2012; **5**:199-217  
8 627 21. Vallianatos H, & Raine, K. Consuming Food and Constructing Identities among  
9 628 Arabic and South Asian Immigrant Women. *Food, Culture and Society* 2008;  
10 629 **11**:355-60  
11 630 22. Panossian LA, Veasey, SC. Daytime sleepiness in obesity: mechanisms beyond  
12 631 obstructive sleep apnea--a review. *Sleep* 2012; **35**:605-15  
13 632 23. Pagel JF. Excessive daytime sleepiness. *Am Fam Physician* 2009; **79**:391-6  
14 633 24. Peterson, PC, Husain, AM. Pediatric narcolepsy. *Brain & development*  
15 634 2008; **30**:609-23  
16 635 25. Newman AB, Spiekerman CF, Enright P, et al. Daytime sleepiness predicts  
17 636 mortality and cardiovascular disease in older adults. The Cardiovascular Health  
18 637 Study Research Group. *J Am Geriatr Soc* 2000; **48**:115-23  
19 638 26. Vgontzas AN, Bixler EO, Chrousos GP. Sleep apnea is a manifestation of the  
20 639 metabolic syndrome. *Sleep Med Rev* 2005; **9**:211-24  
21 640 27. Gaina A, Sekine M, Hamanishi S, et al. Daytime sleepiness and associated factors  
22 641 in Japanese school children. *The Journal of pediatrics* 2007; **151**:518-22, 22 e1-4  
23 642 28. Husain AM, Yancy WS, Jr., Carwile ST, et al. Diet therapy for narcolepsy.  
24 643 *Neurology* 2004; **62**:2300-2  
25 644 29. Cunliffe A, Obeid OA, Powell-Tuck J. Post-prandial changes in measures of  
26 645 fatigue: effect of a mixed or a pure carbohydrate or pure fat meal. *Eur J Clin Nutr*  
27 646 1997; **51**:831-8  
28 647 30. Baron R, Kenny D. The moderator-mediator variable distinction in social  
29 648 psychological research: conceptual, strategic, and statistical considerations. *J Pers*  
30 649 *Soc Psychol* 1986; **51**:1173-82  
31 650 31. Bixler EO, Vgontzas AN, Lin HM, et al. Excessive daytime sleepiness in a  
32 651 general population sample: the role of sleep apnea, age, obesity, diabetes, and  
33 652 depression. *J Clin Endocrinol Metab* 2005; **90**:4510-5  
34 653 32. Chellappa SL, Araujo JF. Excessive daytime sleepiness in patients with  
35 654 depressive disorder. *Rev Bras Psiquiatr* 2006; **28**:126-9  
36 655 33. Mume CO Excessive daytime sleepiness among depressed patients. *Libyan J Med*  
37 656 2010; **5**:doi 10.4176/091024.  
38 657 34. Theorell-Haglow J, Lindberg E, Janson C. What are the important risk factors for  
39 658 daytime sleepiness and fatigue in women? *Sleep* 2006; **29**:751-7  
40 659 35. Macht M, Mueller J. Interactive effects of emotional and restrained eating on  
41 660 responses to chocolate and affect. *The Journal of nervous and mental disease*  
42 661 2007; **195**:1024-6  
43 662 36. Christensen L, Pettijohn L. Mood and carbohydrate cravings. *Appetite*  
44 663 2001; **36**:137-45  
45 664 37. Sabate J. Religion, diet and research. *The British journal of nutrition* 2004; **92**:199-  
46 665 201  
47  
48  
49  
50  
51  
52  
53  
54  
55  
56  
57  
58  
59  
60



- 1  
2  
3 666 38. Statistics Canada Enquête sur la santé dans les collectivités canadiennes (ESCC).  
4 667 Questionnaire pour Cycle 2.1. [http://www.statcan.gc.ca/concepts/health-  
6 668 sante/cycle2\\_1/pdf/cchs-escc-fra.pdf](http://www.statcan.gc.ca/concepts/health-<br/>5 668 sante/cycle2_1/pdf/cchs-escc-fra.pdf). 2003. Accessed 4 June 2011.  
7 669 39. Pi-Sunyer FX. Obesity: criteria and classification. *Proc Nutr Soc* 2000;**59**:505-9  
8 670 40. Health Canada. Canadian Nutrient File. [http://webprod3.hc-sc.gc.ca/cnf-  
10 672 fce/index-eng.jsp](http://webprod3.hc-sc.gc.ca/cnf-<br/>9 671 fce/index-eng.jsp). Accessed May 2 2011.  
11 673 41. Johns MW. A new method for measuring daytime sleepiness: the Epworth  
12 674 42. Johns MW. Reliability and factor analysis of the Epworth Sleepiness Scale. *Sleep*  
13 675 1992;**15**:376-81  
14 676 43. Snyderman NL, Johnson JT, Moller M, et al. Brainstem evoked potentials in adult  
15 677 sleep apnea. *The Annals of otology, rhinology, and laryngology* 1982;**91**:597-8  
16 678 44. Kessler RC, Andrews G, Colpe LJ, et al. Short screening scales to monitor  
17 679 population prevalences and trends in non-specific psychological distress. *Psychol*  
18 680 *Med* 2002; **32**:959-76  
19 681 45. Kenny D. Mediation. <http://davidakenny.net/cm/mediate.htm#BK>. Accessed  
20 682 January 10th 2013.  
21 683 46. Sobel ME. Asymptotic confidence intervals for indirect effects in structural  
22 684 equation models. *Sociological Methodology* 1982;**13**:290-312  
23 685 47. MacKinnon DP, Fairchild AJ, Fritz MS. Mediation analysis. *Annu Rev Psychol*  
24 686 2007;**58**:593-614  
25 687 48. Oliver G, Wardle J, Gibson EL. Stress and food choice: a laboratory study.  
26 688 *Psychosom Med* 2000;**62**:853-65  
27 689 49. Moubarac J-C, Cargo M, Receveur O et al. Describing the Situational  
28 690 Contexts of Sweetened Product Consumption in a Middle Eastern Canadian  
29 691 Community: Application of a Mixed Method Design. *PLoS ONE* 2012;**7**: e44738.  
30 692 doi:10.1371/journal.pone.0044738  
31 693 50. Muzet A, Johnson LC, Spinweber CL. Benzodiazepine hypnotics increase heart  
32 694 rate during sleep. *Sleep* 1982;**5**:256-61  
33 695 51. Caron J, Liu A. A descriptive study of the prevalence of psychological distress  
34 696 and mental disorders in the Canadian population: comparison between low-  
35 697 income and non-low-income populations. *Chronic Dis Can* 2010;**30**:84-94  
36 698 52. Nishiura C, Noguchi J, Hashimoto H. Dietary patterns only partially explain the  
37 699 effect of short sleep duration on the incidence of obesity. *Sleep* 2010;**33**:753-7  
38 700  
39 701  
40 702  
41 703  
42 704  
43 705  
44 706  
45 707  
46 708  
47 709  
48 710  
49 711
